# Supplementary material for: Does Candida and/or Staphylococcus play a role in nipple and breast pain in lactation? A cohort study in Melbourne, Australia
Source: PubMed Central journal article supplement — BMJ Open. 2013 Mar 9;3(3):e002351. doi: 10.1136/bmjopen-2012-002351 (PMC3612759; doi:10.1136/bmjopen-2012-002351), 2013-03-09
Supplement: bmjopen-2012-002351.draft_revisions.pdf [file bmjopen-2012-002351.draft_revisions.pdf]

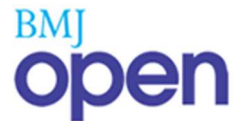

**What role does Candida and/or Staphylococcus play in nipple and breast pain in lactation? A cohort study in Melbourne, Australia**

|                                    |                                                                                                                                                                                                                                                                                                                                                                                                                                                                                                                                                                                      |
|------------------------------------|--------------------------------------------------------------------------------------------------------------------------------------------------------------------------------------------------------------------------------------------------------------------------------------------------------------------------------------------------------------------------------------------------------------------------------------------------------------------------------------------------------------------------------------------------------------------------------------|
| Journal:                           | <i>BMJ Open</i>                                                                                                                                                                                                                                                                                                                                                                                                                                                                                                                                                                      |
| Manuscript ID:                     | bmjopen-2012-002351                                                                                                                                                                                                                                                                                                                                                                                                                                                                                                                                                                  |
| Article Type:                      | Research                                                                                                                                                                                                                                                                                                                                                                                                                                                                                                                                                                             |
| Date Submitted by the Author:      | 15-Nov-2012                                                                                                                                                                                                                                                                                                                                                                                                                                                                                                                                                                          |
| Complete List of Authors:          | Amir, Lisa; La Trobe University, Mother & Child Health Research<br>Donath, Susan; Murdoch Childrens Research Institute, Clinical<br>Epidemiology and Biostatistics Unit<br>Garland, Suzanne; University of Melbourne, Microbiology and Infectious<br>Diseases Department<br>Tabrizi, Sepehr; The Royal Women's Hospital, Microbiology and Infectious<br>Diseases;<br>Bennett, Catherine; Deakin University, Deakin Population Health<br>Cullinane, Meabh; La Trobe University, Mother & Child Health Research<br>Payne, Matthew; La Trobe University, Mother & Child Health Research |
| <b>Primary Subject<br>Heading</b>: | General practice / Family practice                                                                                                                                                                                                                                                                                                                                                                                                                                                                                                                                                   |
| Secondary Subject Heading:         | Obstetrics and gynaecology                                                                                                                                                                                                                                                                                                                                                                                                                                                                                                                                                           |
| Keywords:                          | PRIMARY CARE, Maternal medicine < OBSTETRICS, Microbiology <<br>PATHOLOGY                                                                                                                                                                                                                                                                                                                                                                                                                                                                                                            |
|                                    |                                                                                                                                                                                                                                                                                                                                                                                                                                                                                                                                                                                      |

SCHOLARONE™  
Manuscripts

**Title:****What role does *Candida* and/or *Staphylococcus* play in nipple and breast pain in lactation? A cohort study in Melbourne, Australia**

Lisa H Amir<sup>1</sup>, Susan M Donath<sup>2</sup>, Suzanne M Garland<sup>2,3</sup>, Sepehr N Tabrizi<sup>2,3</sup>, Catherine M Bennett<sup>4</sup>, Meabh Cullinane<sup>1</sup>, Matthew S Payne<sup>1,5</sup>

<sup>1</sup>Mother & Child Health Research, La Trobe University, Melbourne, VIC, Australia

<sup>2</sup>Murdoch Childrens Research Institute, Melbourne, VIC, Australia

<sup>3</sup>Department of Molecular Microbiology, Microbiology and Infectious Diseases, Royal Women's Hospital and Department of Obstetrics and Gynaecology, University of Melbourne, VIC, Australia

<sup>4</sup>Deakin Population Health, Deakin University, Burwood, VIC, Australia

<sup>5</sup>School of Women's and Infants' Health, University of Western Australia, WA, Australia

**Abstract**

**Objective:** To investigate the roles of *Candida* species and *Staphylococcus aureus* in the development of "nipple and breast thrush" among breastfeeding women.

**Design:** Prospective longitudinal cohort study.

**Setting:** Two hospitals in Melbourne, Australia (one public, one private) with follow-up in the community.

**Participants:** 360 nulliparous women recruited at  $\geq 36$  weeks gestation from November 2009 to June 2011. Participants were followed-up six times: in hospital, at home weekly until four weeks postpartum and by telephone at eight weeks.

**Main outcome measures:** A researcher-defined proxy diagnosis of "breast thrush": burning nipple pain and breast pain (not related to mastitis); detection of *Candida* spp. (using culture

1  
2  
3 and PCR) from the mother's vagina, nipple or breast milk or baby's mouth; detection of *S.*  
4  
5 aureus from the mother's nipple or breast milk.  
6

7 **Results:** Women with researcher-defined nipple/breast thrush were more likely to have  
8  
9 *Candida* spp. in nipple/breast milk/baby oral samples (54%) compared to other women (36%,  
10  
11  $p = 0.014$ ). *S. aureus* in nipple/breast milk samples was higher in women with these  
12  
13 symptoms than other women (78% vs 65%) ( $p = 0.068$ ). Time-to-event analysis examined  
14  
15 predictors of nipple/breast thrush up to and including the time of data collection. The crude  
16  
17 Relative Risk of *Candida* spp. in nipple/breast milk/baby was 1.87 (95% CI: 1.10, 3.16,  $p =$   
18  
19 0.018); the multivariate RR (adjusted for *S. aureus* in nipple/breast milk and nipple damage)  
20  
21 was almost unchanged at 2.03 (95% CI: 1.19, 3.45,  $p = 0.009$ ). *S. aureus* colonisation was not  
22  
23 a predictor of these symptoms (RR 1.53, 95% CI: 0.88, 2.64,  $p = 0.13$ ), with little change in  
24  
25 the multivariate model. Nipple damage was also a strong predictor of these symptoms, RR  
26  
27 2.30 (95% CI: 1.19, 4.43,  $p = 0.012$ ), with little change in multivariate model, indicating that  
28  
29 *Candida* spp., *S. aureus* and nipple damage are operating independently.  
30  
31  
32  
33  
34  
35

## 36 Background

37  
38 Controversy about the condition known as "breast thrush" or breast candidiasis in lactating  
39  
40 women has led to confusion among clinicians and the community. While some clinicians may  
41  
42 diagnose and treat this condition in breastfeeding women with deep, radiating breast pain  
43  
44 associated with burning nipple pain,<sup>1-6</sup> others doubt the relationship with fungal organisms<sup>7-11</sup>  
45  
46 and decry "the alarming trend towards believing that fungi are important in the aetiology of  
47  
48 breast infection and deep breast pain associated with breast feeding, despite a lack of good  
49  
50 quality evidence".<sup>11</sup> p. 485. Health professionals may tell women that the pain is "all in their  
51  
52 head", which is reminiscent of the lack of understanding of mastalgia in the 1970s, when  
53  
54 breast pain was thought to be a psychosomatic complaint by "neurotic" women.<sup>12</sup>  
55  
56  
57  
58  
59  
60

1  
2  
3  
4  
5 Unlike mastitis which is diagnosed when a breastfeeding woman experiences inflammation  
6 of the breast associated with systemic symptoms,<sup>13</sup> breast thrush is usually diagnosed when  
7 the breast is not erythematous or indurated, and the woman is afebrile and systemically well  
8 apart from a typical burning pain radiating into the breast and/or into the back.<sup>4</sup> While some  
9 authors use the term 'candida mastitis',<sup>6 11 14</sup> we feel this is misleading, as inflammation of  
10 the breast is not evident. Although some clinicians attribute the pain to infection with *S.*  
11 *aureus* and treat women with long-term antibiotics,<sup>15</sup> this has not been tested in trials.

12  
13  
14  
15  
16  
17  
18  
19  
20  
21  
22  
23 The primary cause of the nipple pain or damage is often the process of breastfeeding itself:  
24 trauma from the infant's mouth due to incorrect attachment, or infant anatomy or  
25 dysfunctional suck.<sup>16</sup> Nipple thrush is usually diagnosed when the nipple/areola is slightly  
26 pink, sensitive to touch, and the pain described is out of proportion to the damage seen on  
27 clinical examination.<sup>4</sup> When the areola is described as itchy and appears red and/or crusty, the  
28 diagnosis is dermatitis/eczema rather than fungal infection.<sup>17</sup> A nipple with obvious damage  
29 is almost certainly colonised with *S. aureus*.<sup>18</sup> Nipple/breast pain associated with nipple  
30 blanching persisting for longer than a few seconds is likely to be nipple vasospasm; this  
31 condition is commonly confused with breast thrush because of the burning, radiating nature  
32 of the pain.<sup>19 20</sup> The pain from vasospasm is often secondary to nipple damage or infection,  
33 exacerbated by cold, and relieved by heat or nifedipine.<sup>21</sup> In practice, more than one cause of  
34 nipple or breast pain is commonly present,<sup>6</sup> which makes it difficult to construct an algorithm  
35 for "breast thrush" for research purposes.

36  
37  
38  
39  
40  
41  
42  
43  
44  
45  
46  
47  
48  
49  
50  
51  
52  
53  
54 Previous breastfeeding studies have been largely cross-sectional,<sup>1 7 9 10</sup> whilst one longitudinal  
55 study collected microbiological data, but no clinical information.<sup>22</sup> This is the first  
56  
57  
58  
59  
60

1  
2  
3 prospective longitudinal study of the role of both *S. aureus* and *Candida* spp. in breast  
4  
5 infections and was designed to resolve the current controversy surrounding which is the  
6  
7 primary organism responsible for the condition known as “breast thrush”: *Candida* spp. or *S.*  
8  
9 *aureus*?  
10

## 11 12 13 14 **Methods**

15  
16  
17 The CASTLE (Candida and Staphylococcus Transmission: Longitudinal Evaluation) study  
18  
19 was a prospective longitudinal descriptive study designed to investigate the role of  
20  
21 staphylococci and/or candida in nipple and breast pain, and the relationship between  
22  
23 breastfeeding, postpartum health problems and maternal psychological well-being. Details  
24  
25 have been published in the study protocol.<sup>23</sup> A cohort of 360 nulliparous women planning to  
26  
27 breastfeed for at least two months were recruited at  $\geq 36$  weeks gestation from two hospitals  
28  
29 in Melbourne, Australia (November 2009 to June 2011). At recruitment, nasal, nipple (both  
30  
31 breasts) and vaginal swabs were collected and participants completed a questionnaire asking  
32  
33 about previous staphylococcal and candida infections. Following birth, participants were  
34  
35 followed-up six times: face-to-face in hospital, then weekly at home until four weeks  
36  
37 postpartum. Participants filled out a questionnaire at each time point to collect information  
38  
39 about breastfeeding problems and postpartum health problems. At each visit, maternal nasal,  
40  
41 and nipple swabs and breast milk samples (both breasts) and infant oral and nasal swabs were  
42  
43 collected. At a final telephone interview at eight weeks postpartum information about  
44  
45 breastfeeding problems and postpartum health was collected.  
46  
47  
48  
49  
50

51  
52 Briefly, two nipple swabs were obtained from each nipple; a standard charcoal swab for  
53  
54 microbiological analysis (Copan Diagnostics Inc. CA, USA) and a flocculated swab for  
55  
56 molecular analysis (Copan Diagnostics Inc. CA, USA). After first moistening in sterile saline,  
57  
58  
59  
60

1  
2  
3 both the standard and flocked nipple swabs were rolled over the nipple and areola together  
4  
5 using a 10-point swabbing technique<sup>24</sup> paying particular attention to any cracks / fissures  
6  
7 present. Oral and vaginal swabs were collected for culture of *S. aureus* and *Candida* spp.  
8  
9 Breast milk samples were also cultured for *S. aureus*, coagulase-negative staphylococci  
10  
11 (CoNS) and *Candida* spp; nasal swabs were collected for culture of *S. aureus* only. DNA was  
12  
13 extracted from nipple and vaginal swabs for molecular identification of *Candida* spp. using  
14  
15 real-time PCR.<sup>23</sup>  
16  
17  
18  
19

20  
21 At each contact, women were asked about nipple pain and whether it was burning in quality,  
22  
23 clinical signs and symptoms of mastitis as used in previous research (i.e. redness, fever,  
24  
25 etc.),<sup>25</sup> and other types of breast pain, such as radiating ("stabbing") or non-stabbing.  
26  
27 Researchers also collected clinical observations of nipple/areola and breast at each visit  
28  
29 (weeks 1 to 4), including colour of nipple/areola. We had planned to develop an algorithm for  
30  
31 "nipple or breast thrush" using symptoms and appearance ("shiny" or flaky" nipple) or pink  
32  
33 colour.<sup>26</sup> However, very few women were described as having these appearances (shiny, n =  
34  
35 4, flaky, n = 17), while 140 women were described as having "pink" nipple/s making the  
36  
37 appearance identifiers unlikely to be helpful in the algorithm. Therefore we used a  
38  
39 combination of burning nipple pain and breast pain (non-mastitis) as a proxy for a clinical  
40  
41 diagnosis of "nipple and breast thrush".  
42  
43  
44

45 Statistical analysis was conducted using Stata Version 12. Hypothesis 1 — Women with  
46  
47 nipple/breast thrush are more likely to have *Candida* spp. isolated than other women;  
48  
49 hypothesis 2 — Women with nipple/breast thrush are more likely to have *S. aureus* isolated  
50  
51 than other women. A sample of 318 women was estimated to provide adequate power.<sup>23</sup> Chi-  
52  
53 squared tests were used for comparing categorical variables. We investigated incidence of  
54  
55 nipple/breast thrush using a multivariable discrete version of the proportional hazards  
56  
57  
58  
59  
60

1  
2  
3 regression model.<sup>27</sup> Outcome variable was the incidence of new cases of our breast thrush  
4 diagnosis; time-varying predictors were: the presence of *Candida* spp. , presence of *S. aureus*  
5 and mother-reported nipple damage. We present crude Relative Risks (RR), and multivariate  
6 analysis, adjusting for the presence of *Candida* spp, *S. aureus* and nipple damage.  
7  
8  
9  
10

11  
12  
13  
14 Results relating to mastitis, other breastfeeding and postpartum problems will be published  
15 separately (papers in preparation).  
16  
17  
18  
19

## 20 21 Results

22  
23  
24 Fourteen women withdrew from the study after giving birth, leaving 346 women available for  
25 data collection at subsequent visits; 340 women completed the study at 8 weeks postpartum.

26  
27  
28 Women who participated in the study were highly educated (77% had tertiary degree or  
29 higher) and most were married or lived with their partner (96%) (Table 1). Just over half gave  
30 birth in the private hospital (56%), 45% by Caesarean section.  
31  
32  
33

34  
35  
36  
37 Burning nipple pain was reported by 42% of women (146/346) during weeks 1 to 8, or 32%  
38 women (111/346) during weeks 2 to 8. Radiating or non-radiating breast pain (not related to  
39 engorgement/mastitis) was reported by 54% of women (186/346) during weeks 1 to 8, or  
40 47% of women (162/346) during weeks 2 to 8. Combining these symptoms to estimate the  
41 proportion of women with both burning nipple pain and non-mastitis breast pain (at the same  
42 time): 19% of women in weeks 1 to 8 (65/346), or 15% in weeks 2 to 8 (50/346).  
43  
44  
45  
46  
47  
48  
49  
50

51  
52  
53 *Candida albicans* was the most commonly isolated *Candida* spp in culture with *Candida*  
54 *glabrata* only isolated in one nipple specimen and one milk sample (Table 2). Although  
55 "other *Candida* spp." were found, none speciated as *Candida krusei* or *Candida kefyr*.  
56  
57  
58  
59  
60

1  
2  
3 *Candida* PCR of the nipple was positive for *Candida* spp. in 33% of women (115/346); in  
4  
5 contrast to culture of only 3% of women (9/346) being positive for *Candida* spp.. *Candida*  
6  
7 spp. were isolated by culture from breast milk samples from 5% women (18/346), but no  
8  
9 molecular analyses were conducted on these samples. *S. aureus* was isolated by culture from  
10  
11 the nipple and/or breast milk in 67% of women (231/346), and from nose and/or mouth of  
12  
13 73% of infants (253/346).  
14  
15

16  
17  
18 As burning nipple pain was very common if week 1 were included, we developed a proxy  
19  
20 diagnosis for nipple/breast thrush if women had burning nipple pain as well as breast pain  
21  
22 (non-mastitis) between weeks 2 and 8. There was a statistically significant association  
23  
24 between these symptoms and *Candida* spp. in nipple/breast milk/baby ( $p = 0.014$ , see Table  
25  
26 3); as also for *Candida* spp. in vagina/nipple/breast milk/baby ( $p = 0.047$ , not shown). There  
27  
28 was evidence that *S. aureus* in nipple/breast milk samples was higher in women with these  
29  
30 symptoms than other women (78% vs 65%) ( $p = 0.068$ , Table 3).  
31  
32  
33  
34  
35

36 Time-to-event analysis examined predictors of burning nipple and breast pain (non-mastitis)  
37  
38 up to and including the time of data collection. (See unadjusted survival curves: Figures 1, 2  
39  
40 and 3). The crude Relative Risk of candida in nipple/breast milk/baby was 1.87 (95% CI:  
41  
42 1.10, 3.16,  $p = 0.018$ ); the multivariate RR (adjusted for *S. aureus* in nipple/breast milk and  
43  
44 nipple damage) was almost unchanged at 2.03 (95% CI: 1.19, 3.45,  $p = 0.009$ ). *S. aureus*  
45  
46 colonisation was not a predictor of these symptoms (RR 1.53, 95% CI: 0.88, 2.64,  $p = 0.13$ ),  
47  
48 with little change in the multivariate model. Mothers' report of nipple damage was also a  
49  
50 strong predictor of these symptoms, with a RR 2.30 (95% CI: 1.19, 4.43,  $p = 0.012$ ), with  
51  
52 little change in multivariate model, which indicates that candida, *S. aureus* and nipple  
53  
54 damage are operating independently.  
55  
56  
57  
58  
59  
60



## Discussion

### Principal findings

Unlike some cross-sectional studies which found no relationship between the presence of *Candida* spp. and the condition known as breast thrush,<sup>9 10</sup> we have shown that *Candida* spp. is associated with burning nipple pain and breast pain – in two analyses (‘at any time’ and ‘time-to-event’). As in previous studies,<sup>1 7</sup> we uncommonly isolated *Candida* spp. on the nipple using standard microbiological culture techniques. However, *Candida* spp. were more commonly identified using more sensitive molecular techniques (real-time PCR). This test is not used in routine practice currently, and therefore it is not helpful in making the diagnosis in clinical care. Diagnostic skills are needed to make the diagnosis of nipple/breast candidiasis; clinicians should routinely consider all causes of nipple and breast pain, in the same way they consider differential diagnoses when assessing a patient with chest pain.<sup>28</sup>

Consistent with other studies of mothers and infants,<sup>22 29-32</sup> colonisation with *S. aureus* is common; at least 50% of women were colonised with *S. aureus* in nipple or milk samples by four weeks postpartum. Therefore in clinical practice, a finding of *S. aureus* on the nipple or breast milk is not evidence that the bacteria are the principal cause of the woman’s pain. Our analysis indicates that candida and *S. aureus* are acting independently, despite often co-existing. The case-control study of women with a clinical diagnosis of nipple and breast thrush by Panjaitan and colleagues which only used molecular techniques from nipple swabs and excluded women with clinical signs of bacterial infection (exudate on nipple or inflamed breast), found that *S. aureus* was present in equal numbers of cases and controls.<sup>33</sup>

### Strengths and limitations

1  
2  
3 The strength of this study is that a cohort of healthy women who had not previously breastfed  
4  
5 was recruited prior to commencing breastfeeding and was followed closely until two months  
6  
7 postpartum. The main limitation is that we did not have a clinical diagnosis of nipple/breast  
8  
9 thrush and had to use a proxy diagnosis to estimate this condition. Another limitation is that  
10  
11 we only followed the cohort for eight weeks postpartum – with microbiological data to only  
12  
13 four weeks postpartum; women who developed problems after this time period were not  
14  
15 captured in our data collection.  
16  
17  
18  
19

## 20 21 **Conclusions**

22  
23 This large cohort study confirms that *Candida* spp. play a role in nipple and breast pain in  
24  
25 lactating women, and “thrush in the breast” should not be dismissed as “psychosomatic” as  
26  
27 has been stated by some clinicians. Burning nipple pain is common in breastfeeding women,  
28  
29 and a diagnosis of *Candida* spp. infection should not be made without considering differential  
30  
31 diagnoses.<sup>4</sup> Further research into the role of staphylococci in breast pain in lactating women  
32  
33 with inflammatory symptoms and without is needed.  
34  
35  
36  
37  
38

## 39 **References**

- 40  
41  
42  
43  
44 1. Amir LH, Garland SM, Dennerstein L, Farish SJ. *Candida albicans*: is it associated with  
45 nipple pain in lactating women? *Gynecol Obstet Invest* 1996;41(1):30-34.  
46 2. Montgomery AM. Breastfeeding and postpartum maternal care. *Prim Care*  
47 2000;27(1):237-50.  
48 3. Brent NB. Thrush in the breastfeeding dyad: results of a survey on diagnosis and treatment.  
49 *Clin Pediatr (Phila)* 2001;40(9):503-06.  
50 4. Moorhead AM, Amir LH, O'Brien PW, Wong S. A prospective study of fluconazole  
51 treatment for breast and nipple thrush. *Breastfeed Rev* 2011;19(3):25-29.  
52 5. Hoddinott P, Tappin D, Wright C. Breast feeding. *BMJ* 2008;336(7649):881-87.  
53 6. Heller MM, Fullerton-Stone H, Murase JE. Caring for new mothers: diagnosis,  
54 management and treatment of nipple dermatitis in breastfeeding mothers. *Int J*  
55 *Dermatol* 2012;51(10):1149-61.  
56  
57  
58  
59  
60

- 1
- 2
- 3 7. Thomassen P, Johansson VA, Wassberg C, Petrini B. Breast-feeding, pain and infection. *Gynecol Obstet Invest* 1998;46(2):73-74.
- 4
- 5 8. Carmichael AR, Dixon JM. Is lactation mastitis and shooting breast pain experienced by
- 6 women during lactation caused by *Candida albicans*? *Breast* 2002;11:88-90.
- 7
- 8 9. Graves S, Wright W, Harman R, Bailey S. Painful nipples in nursing mothers: Fungal or
- 9 staphylococcal? A preliminary study. *Aust Fam Physician* 2003;32(7):570-71.
- 10
- 11 10. Hale TW, Bateman TL, Finkelman MA, Berens PD. The absence of *Candida albicans* in
- 12 milk samples of women with clinical symptoms of ductal candidiasis. *Breastfeed Med*
- 13 2009;4(2):57-61.
- 14
- 15 11. Dixon JM, Khan LR. Treatment of breast infection. *BMJ* 2011;342:484-89.
- 16
- 17 12. Preece PE, Mansel RE, Hughes LE. Mastalgia: psychoneurosis or organic disease? *Br*
- 18 *Med J* 1978;1:29-30.
- 19
- 20 13. Amir LH, The Academy of Breastfeeding Medicine Protocol Committee. ABM Clinical
- 21 Protocol # 4: Mastitis, Revision, May 2008. *Breastfeed Med* 2008;3(3):177-80.
- 22
- 23 14. Hanna L, Cruz SA. *Candida* mastitis: a case report. *Perm J* 2011;15(1):62-64.
- 24
- 25 15. Eglash A, Plane MB, Mundt M. History, physical and laboratory findings, and clinical
- 26 outcomes of lactating women treated with antibiotics for chronic breast and/or nipple
- 27 pain. *J Hum Lact* 2006;22(4):429-33.
- 28
- 29 16. Watson Genna C. The influence of anatomical and structural issues on sucking skills. In:
- 30 Watson Genna C, editor. *Supporting Sucking Skills in Breastfeeding Infants*. Sudbury,
- 31 Massachusetts: Jones and Bartlett Publishers, 2008:181-226.
- 32
- 33 17. Barankin B, Gross MS. Nipple and areolar eczema in the breastfeeding woman. *J Cutan*
- 34 *Med Surg* 2004;8(2):126-30.
- 35
- 36 18. Livingstone V, Stringer LJ. The treatment of *Staphylococcus aureus* infected sore
- 37 nipples: A randomized comparative study. *J Hum Lact* 1999;15(3):241-46.
- 38
- 39 19. Page SM, McKenna DS. Vasospasm of the nipple presenting as painful lactation. *Obstet*
- 40 *Gynec* 2006;108(3):806-08.
- 41
- 42 20. Amir LH. Breast pain in lactating women - mastitis or something else? *Aust Fam*
- 43 *Physician* 2003;32(3):141-45.
- 44
- 45 21. Anderson JE, Held N, Wright K. Raynaud's phenomenon of the nipple: a treatable cause
- 46 of painful breastfeeding. *Pediatrics* 2004;113(4):e360-4.
- 47
- 48 22. Peacock SJ, Justice A, Griffiths D, de Silva GD, Kantzanou MN, Crook D, et al.
- 49 Determinants of acquisition and carriage of *Staphylococcus aureus* in infancy. *J Clin*
- 50 *Microbiol* 2003;41(12):5718-25.
- 51
- 52 23. Amir LH, Cullinane M, Garland SM, Tabrizi SN, Donath SM, Bennett CM, et al. The
- 53 role of micro-organisms (*Staphylococcus aureus* and *Candida albicans*) in the
- 54 pathogenesis of breast pain and infection in lactating women: study protocol. *BMC*
- 55 *Pregnancy Childbirth* 2011;11:54.
- 56
- 57 24. Stuebe A. Lactation culture protocol
- 58 [http://www.mombaby.org/PDF/culture\\_protocol.2.0.pdf](http://www.mombaby.org/PDF/culture_protocol.2.0.pdf), 2011.
- 59
- 60 25. Amir LH, Forster DA, Lumley J, McLachlan H. A descriptive study of mastitis in
- Australian breastfeeding women: incidence and determinants *BMC Public Health*
- 2007;7:62.
26. Francis-Morrill J, Heinig MJ, Pappagianis D, Dewey KG. Diagnostic value of signs and
- symptoms of mammary candidosis among lactating women. *J Hum Lact*
- 2004;20(3):288-95.
27. Carlin JB, Wolfe R, Coffey C, Patton GC. Analysis of binary outcomes in longitudinal
- studies using weighted estimating equations and discrete-time survival methods:
- prevalence and incidence of smoking in an adolescent cohort. *Stat Med*
- 1999;18(19):2655-79.

- 1  
2  
3 28. Yelland M, Cayley WE, Jr., Vach W. An algorithm for the diagnosis and management of  
4 chest pain in primary care. *Med Clin North Am* 2010;94(2):349-74.  
5 29. Amir LH, Garland SM, Lumley J. A case-control study of mastitis: nasal carriage of  
6 *Staphylococcus aureus*. *BMC Fam Pract* 2006;7:57.  
7 30. Kawada M, Okuzumi K, Hitomi S, Sugishita C. Transmission of *Staphylococcus aureus*  
8 between healthy, lactating mothers and their infants by breastfeeding. *J Hum Lact*  
9 2003;19(4):411-17.  
10 31. Jimenez-Truque N, Tedeschi S, Saye EJ, McKenna BD, Langdon W, Wright JP, et al.  
11 Relationship between maternal and neonatal *Staphylococcus aureus* colonization.  
12 *Pediatrics* 2012;129(5):e1252-9.  
13 32. Leshem E, Maayan-Metzger A, Rahav G, Dolitzki M, Kuint J, Roytman Y, et al.  
14 Transmission of *Staphylococcus aureus* from mothers to newborns. *Pediatr Infect Dis*  
15 *J* 2012;31(4):360-3.  
16 33. Panjaitan M, Amir LH, Costa A-M, Rudland E, Tabrizi SN. Polymerase chain reaction in  
17 detection of *Candida albicans* for confirmation of clinical diagnosis of nipple thrush  
18 (Letter). *Breastfeed Med* 2008;3(3):185-87.  
19  
20  
21  
22  
23

24 Contributors: LHA conceived the study, which was designed in collaboration with all  
25 authors. SMD managed the data and conducted the statistical analyses. SMG, SNT, CMB and  
26 MSP provided microbiological expertise. MC was the project co-ordinator. MSP was the  
27 research scientist.

28 Competing interests: All authors have completed the ICMJE uniform disclosure form at  
29 [www.icjme.org/coi\\_disclosure.pdf](http://www.icjme.org/coi_disclosure.pdf) (available on request from the corresponding author) and  
30 declare that: this stud received financial support from the National Health & Medical  
31 Research Council (NHMRC) (project grant 502053, equipment grant, Health Professional  
32 Training Fellowship (LHA)), Helen Mcpherson Smith Trust, Faculty Research Grant, Faculty  
33 of Health Sciences, La Trobe University; no financial relationships with any organisations  
34 that might have an interest in the submitted work; and no other relationships or activities that  
35 could appear to have influenced the submitted work.

36 Ethical approval: This study was approved by the La Trobe University Human Ethics  
37 Committee (06-078); Human Research Ethics Committee of the Royal Women's Hospital  
38 (06/41); Human Research Ethics Committee of the University of Melbourne (1033949); and  
39 Medical Advisory Committee at Frances Perry House.

1  
2  
3 Data sharing: No additional data available.  
4

5 Funding: Funded by National Health and Medical Research Council, Australia.  
6

## 7 **Article summary**

### 8 **Article Focus**

- 9
- 10 • Controversy about the condition known as "breast thrush" or breast candidiasis in  
11 lactating women has led to confusion among clinicians and the community.  
12
  - 13 • Previous studies have been cross-sectional.  
14
  - 15 • This is the first prospective longitudinal study of the role of both *S. aureus* and *Candida*  
16 spp. in breast infections and was designed to resolve the current controversy surrounding  
17 which is the primary organism responsible for the condition known as "breast thrush":  
18 *Candida* spp. or *S. aureus*?  
19  
20  
21  
22  
23  
24  
25  
26  
27  
28  
29

### 30 **Key Messages**

- 31 • *Candida* spp. is associated with burning nipple pain and breast pain.  
32
- 33 • Colonisation with *S. aureus* is common; at least 50% of women were colonised with *S.*  
34 *aureus* in nipple or milk samples by four weeks postpartum.  
35  
36  
37  
38  
39  
40  
41

### 42 **Strengths and Limitations**

- 43 • The evidence of microbiological data from this large cohort of women over four weeks  
44 postpartum is stronger than previous smaller cross-sectional studies.  
45  
46
- 47 • *Candida* spp. were more commonly identified using more sensitive molecular techniques  
48 (real-time PCR) than by using standard microbiological culture techniques.  
49  
50
- 51 • As these techniques are not used in clinical practice currently, this is not currently useful  
52 for clinicians.  
53  
54  
55  
56  
57  
58  
59  
60

**Table 1 Characteristics of nulliparous women recruited in late pregnancy**

| <b>Maternal characteristics (n = 346)</b>               | <b>n (%)</b>        |
|---------------------------------------------------------|---------------------|
| Hospital                                                |                     |
| Royal Women's Hospital (public)                         | 154 (44.5)          |
| Frances Perry House (private)                           | 192 (55.5)          |
| Age (years - mean, SD, range)                           | 32.7 (4.1, 19 - 44) |
| Marital status                                          |                     |
| Married                                                 | 229 (66)            |
| Unmarried , living with partner                         | 103 (30)            |
| Not living with partner                                 | 2 (1)               |
| Separated / divorced                                    | 1 (0)               |
| Single                                                  | 11 (3)              |
| Education level                                         |                     |
| Tertiary degree or higher                               | 267 (77)            |
| Other                                                   | 79 (23)             |
| Gestation at recruitment (weeks - mean, SD, range)      | 37 (1.3, 34 - 42)   |
| Gestation at birth (weeks - mean, SD, range)            | 39 (1.2, 36 - 42)   |
| Breastfeeding intention (months - mean, range)          | 9.7 (1 - 24)        |
| Caesarean birth                                         | 156 (45)            |
| Baby sex – male                                         | 168 (49)            |
| Any breast milk feeding at 8 weeks postpartum (n = 340) | 320 (94)            |

**Table 2 Results from microbiological analysis of specimens collected from 346 women and their infants (at any time point)**

|                                                           | <b>Culture positive</b> | <b>PCR positive</b> | <b>Either culture/PCR positive</b> |
|-----------------------------------------------------------|-------------------------|---------------------|------------------------------------|
| <b>Nipple*</b>                                            |                         |                     |                                    |
| <i>C. albicans</i>                                        | 13                      | 15                  | 19                                 |
| <i>C. glabrata</i>                                        | 1                       | 3                   | 4                                  |
| <i>Candida</i> spp.                                       | 9                       | 115                 | 120                                |
| <b>Any <i>Candida</i> spp.</b>                            | <b>21</b>               | <b>116</b>          | <b>125</b>                         |
| <i>S. aureus</i>                                          | 206 (60%)               | N/A                 | N/A                                |
| <b>Breast milk**</b>                                      |                         |                     |                                    |
| <i>C. albicans</i>                                        | 9                       | N/A                 | N/A                                |
| <i>C. glabrata</i>                                        | 1                       | N/A                 | N/A                                |
| <i>Candida</i> spp.                                       | 10                      | N/A                 | N/A                                |
| <b>Any <i>Candida</i> spp.</b>                            | <b>18</b>               | <b>N/A</b>          | <b>N/A</b>                         |
| <i>S. aureus</i>                                          | 186 (54%)               | N/A                 | N/A                                |
| <b>Infant nose/mouth**</b>                                |                         |                     |                                    |
| <i>C. albicans</i>                                        | 15                      | N/A                 | N/A                                |
| <i>C. glabrata</i>                                        | 0                       | N/A                 | N/A                                |
| <i>Candida</i> spp.                                       | 5                       | N/A                 | N/A                                |
| <b>Any <i>Candida</i> spp.</b>                            | <b>18</b>               | <b>N/A</b>          | <b>N/A</b>                         |
| <i>S. aureus</i>                                          | 253 (73%)               | N/A                 | N/A                                |
| <b>Any <i>Candida</i> spp. in nipple/breast milk/baby</b> | <b>133 (38)</b>         |                     |                                    |
| <b>Any <i>S. aureus</i> in nipple/breast milk</b>         | <b>231 (67%)</b>        |                     |                                    |

\* Nipple swabs collected at late pregnancy, hospital, weeks 1, 2, 3 and 4.

\*\* Breast milk, and infant nasal and oral swabs, collected at hospital, weeks 1, 2, 3 and 4.

N/A = not applicable.

**Table 3 Nipple/breast thrush symptoms and *Candida* spp. and *S. aureus* separately (n = 346)**

Breast thrush algorithm: Burning nipple pain weeks 2-8 plus breast pain (non-mastitis)

| <i>Candida</i> spp. (nipple/breast milk/baby)* |           |           |
|------------------------------------------------|-----------|-----------|
| Breast thrush algorithm                        | No        | Yes       |
|                                                | (n = 213) | (n = 133) |
| No (n = 278)                                   | 180 (65%) | 98 (35%)  |
| Yes (n = 68)                                   | 33 (49%)  | 35 (52%)  |
| <i>S. aureus</i> (nipple/breast milk)**        |           |           |
| Breast thrush algorithm                        | No        | Yes       |
|                                                | (n = 115) | (n = 231) |
| No (n = 278)                                   | 97 (35%)  | 181 (65%) |
| Yes (n = 68)                                   | 18 (27%)  | 50 (74%)  |

\*Chi<sup>2</sup>(1) = 6.0734, p = 0.014

\*\*Chi<sup>2</sup>(1) = 1.7462, p = 0.186



1  
2  
3  
4  
5  
6  
7  
8  
9  
10  
11  
12  
13  
14  
15  
16  
17  
18  
19  
20  
21  
22  
23  
24  
25  
26  
27  
28  
29  
30  
31  
32  
33  
34  
35  
36  
37  
38  
39  
40  
41  
42  
43  
44  
45  
46  
47  
48  
49  
50  
51  
52  
53  
54  
55  
56  
57  
58  
59  
60

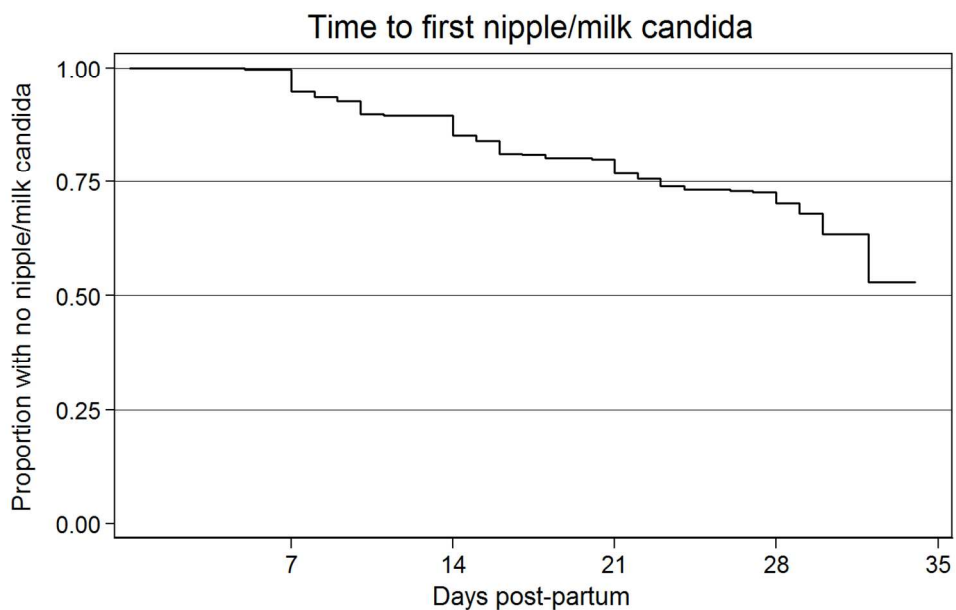

Survival curve for time to first nipple/milk candida

Review only

1  
2  
3  
4  
5  
6  
7  
8  
9  
10  
11  
12  
13  
14  
15  
16  
17  
18  
19  
20  
21  
22  
23  
24  
25  
26  
27  
28  
29  
30  
31  
32  
33  
34  
35  
36  
37  
38  
39  
40  
41  
42  
43  
44  
45  
46  
47  
48  
49  
50  
51  
52  
53  
54  
55  
56  
57  
58  
59  
60

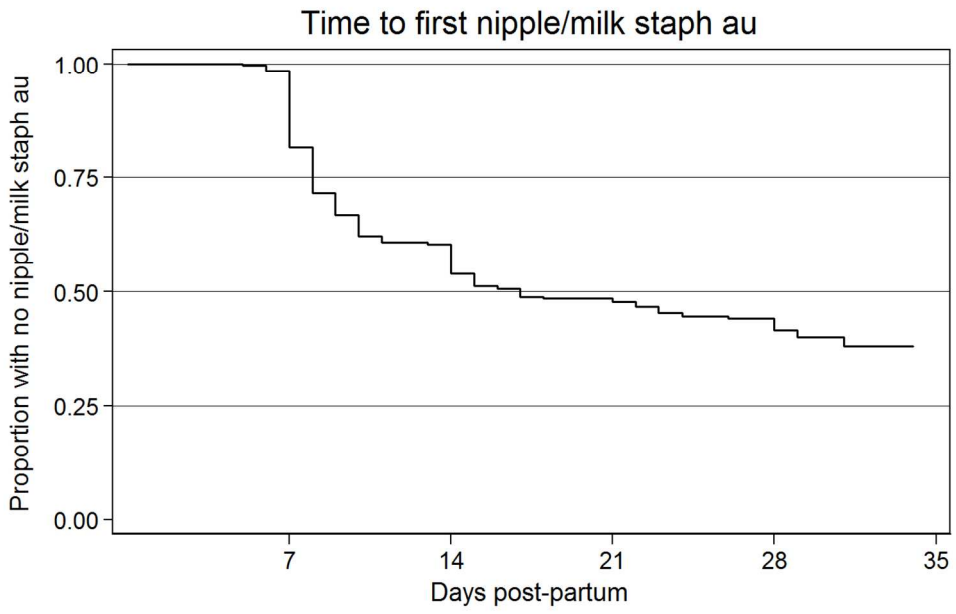

Survival curve for time to first nipple/milk S. aureus

Review only

1  
2  
3  
4  
5  
6  
7  
8  
9  
10  
11  
12  
13  
14  
15  
16  
17  
18  
19  
20  
21  
22  
23  
24  
25  
26  
27  
28  
29  
30  
31  
32  
33  
34  
35  
36  
37  
38  
39  
40  
41  
42  
43  
44  
45  
46  
47  
48  
49  
50  
51  
52  
53  
54  
55  
56  
57  
58  
59  
60

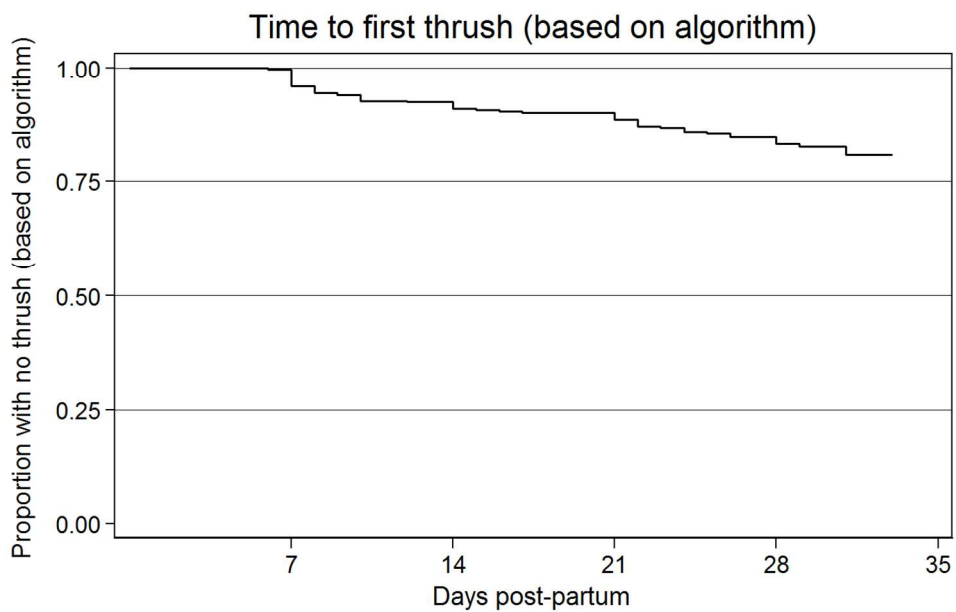

Survival curve for time to first symptoms of "breast thrush"

Review only

STROBE Statement—Checklist of items that should be included in reports of *cohort studies*

|                              | Item No | Recommendation                                                                                                                                                                                                                                                                                                         |
|------------------------------|---------|------------------------------------------------------------------------------------------------------------------------------------------------------------------------------------------------------------------------------------------------------------------------------------------------------------------------|
| <b>Title and abstract</b>    | 1       | (a) Indicate the study's design with a commonly used term in the title or the abstract                                                                                                                                                                                                                                 |
| <b>Yes</b>                   |         | (b) Provide in the abstract an informative and balanced summary of what was done and what was found                                                                                                                                                                                                                    |
| <b>Introduction</b>          |         |                                                                                                                                                                                                                                                                                                                        |
| <b>Yes</b>                   |         |                                                                                                                                                                                                                                                                                                                        |
| Background/rationale         | 2       | Explain the scientific background and rationale for the investigation being reported                                                                                                                                                                                                                                   |
| Objectives                   | 3       | State specific objectives, including any prespecified hypotheses                                                                                                                                                                                                                                                       |
| <b>Methods</b>               |         |                                                                                                                                                                                                                                                                                                                        |
| <b>Yes</b>                   |         |                                                                                                                                                                                                                                                                                                                        |
| Study design                 | 4       | Present key elements of study design early in the paper                                                                                                                                                                                                                                                                |
| Setting                      | 5       | Describe the setting, locations, and relevant dates, including periods of recruitment, exposure, follow-up, and data collection                                                                                                                                                                                        |
| Participants                 | 6       | (a) Give the eligibility criteria, and the sources and methods of selection of participants. Describe methods of follow-up<br>(b) For matched studies, give matching criteria and number of exposed and unexposed N/A                                                                                                  |
| Variables                    | 7       | Clearly define all outcomes, exposures, predictors, potential confounders, and effect modifiers. Give diagnostic criteria, if applicable                                                                                                                                                                               |
| Data sources/<br>measurement | 8*      | For each variable of interest, give sources of data and details of methods of assessment (measurement). Describe comparability of assessment methods if there is more than one group                                                                                                                                   |
| Bias                         | 9       | Describe any efforts to address potential sources of bias                                                                                                                                                                                                                                                              |
| Study size                   | 10      | Explain how the study size was arrived at                                                                                                                                                                                                                                                                              |
| Quantitative variables       | 11      | Explain how quantitative variables were handled in the analyses. If applicable, describe which groupings were chosen and why                                                                                                                                                                                           |
| Statistical methods          | 12      | (a) Describe all statistical methods, including those used to control for confounding<br>(b) Describe any methods used to examine subgroups and interactions<br>(c) Explain how missing data were addressed<br>(d) If applicable, explain how loss to follow-up was addressed<br>(e) Describe any sensitivity analyses |
| <b>Results</b>               |         |                                                                                                                                                                                                                                                                                                                        |
| <b>YES</b>                   |         |                                                                                                                                                                                                                                                                                                                        |
| Participants                 | 13*     | (a) Report numbers of individuals at each stage of study—eg numbers potentially eligible, examined for eligibility, confirmed eligible, included in the study, completing follow-up, and analysed<br>(b) Give reasons for non-participation at each stage<br>(c) Consider use of a flow diagram                        |
| Descriptive data             | 14*     | (a) Give characteristics of study participants (eg demographic, clinical, social) and information on exposures and potential confounders<br>(b) Indicate number of participants with missing data for each variable of interest<br>(c) Summarise follow-up time (eg, average and total amount)                         |
| Outcome data                 | 15*     | Report numbers of outcome events or summary measures over time                                                                                                                                                                                                                                                         |
| Main results                 | 16      | (a) Give unadjusted estimates and, if applicable, confounder-adjusted estimates and their precision (eg, 95% confidence interval). Make clear which confounders were adjusted for and why they were included                                                                                                           |

|                          |    |                                                                                                                                                                            |
|--------------------------|----|----------------------------------------------------------------------------------------------------------------------------------------------------------------------------|
|                          |    | (b) Report category boundaries when continuous variables were categorized                                                                                                  |
|                          |    | (c) If relevant, consider translating estimates of relative risk into absolute risk for a meaningful time period                                                           |
| Other analyses           | 17 | Report other analyses done—eg analyses of subgroups and interactions, and sensitivity analyses                                                                             |
| <b>Discussion</b>        |    |                                                                                                                                                                            |
| <b>YES</b>               |    |                                                                                                                                                                            |
| Key results              | 18 | Summarise key results with reference to study objectives                                                                                                                   |
| Limitations              | 19 | Discuss limitations of the study, taking into account sources of potential bias or imprecision. Discuss both direction and magnitude of any potential bias                 |
| Interpretation           | 20 | Give a cautious overall interpretation of results considering objectives, limitations, multiplicity of analyses, results from similar studies, and other relevant evidence |
| Generalisability         | 21 | Discuss the generalisability (external validity) of the study results                                                                                                      |
| <b>Other information</b> |    |                                                                                                                                                                            |
| <b>YES</b>               |    |                                                                                                                                                                            |
| Funding                  | 22 | Give the source of funding and the role of the funders for the present study and, if applicable, for the original study on which the present article is based              |

\*Give information separately for exposed and unexposed groups.

**Note:** An Explanation and Elaboration article discusses each checklist item and gives methodological background and published examples of transparent reporting. The STROBE checklist is best used in conjunction with this article (freely available on the Web sites of PLoS Medicine at <http://www.plosmedicine.org/>, Annals of Internal Medicine at <http://www.annals.org/>, and Epidemiology at <http://www.epidem.com/>). Information on the STROBE Initiative is available at <http://www.strobe-statement.org>.



**Does Candida and/or Staphylococcus play a role in nipple and breast pain in lactation? A cohort study in Melbourne, Australia**

|                                    |                                                                                                                                                                                                                                                                                                                                                                                                                                                                                                                                                                                      |
|------------------------------------|--------------------------------------------------------------------------------------------------------------------------------------------------------------------------------------------------------------------------------------------------------------------------------------------------------------------------------------------------------------------------------------------------------------------------------------------------------------------------------------------------------------------------------------------------------------------------------------|
| Journal:                           | <i>BMJ Open</i>                                                                                                                                                                                                                                                                                                                                                                                                                                                                                                                                                                      |
| Manuscript ID:                     | bmjopen-2012-002351.R1                                                                                                                                                                                                                                                                                                                                                                                                                                                                                                                                                               |
| Article Type:                      | Research                                                                                                                                                                                                                                                                                                                                                                                                                                                                                                                                                                             |
| Date Submitted by the Author:      | 31-Jan-2013                                                                                                                                                                                                                                                                                                                                                                                                                                                                                                                                                                          |
| Complete List of Authors:          | Amir, Lisa; La Trobe University, Mother & Child Health Research<br>Donath, Susan; Murdoch Childrens Research Institute, Clinical<br>Epidemiology and Biostatistics Unit<br>Garland, Suzanne; University of Melbourne, Microbiology and Infectious<br>Diseases Department<br>Tabrizi, Sepehr; The Royal Women's Hospital, Microbiology and Infectious<br>Diseases;<br>Bennett, Catherine; Deakin University, Deakin Population Health<br>Cullinane, Meabh; La Trobe University, Mother & Child Health Research<br>Payne, Matthew; La Trobe University, Mother & Child Health Research |
| <b>Primary Subject<br>Heading</b>: | General practice / Family practice                                                                                                                                                                                                                                                                                                                                                                                                                                                                                                                                                   |
| Secondary Subject Heading:         | Obstetrics and gynaecology, Dermatology, Diagnostics                                                                                                                                                                                                                                                                                                                                                                                                                                                                                                                                 |
| Keywords:                          | PRIMARY CARE, Maternal medicine < OBSTETRICS, Microbiology <<br>PATHOLOGY                                                                                                                                                                                                                                                                                                                                                                                                                                                                                                            |
|                                    |                                                                                                                                                                                                                                                                                                                                                                                                                                                                                                                                                                                      |

SCHOLARONE™  
Manuscripts

**Title:****Does Candida and/or Staphylococcus play a role in nipple and breast pain in lactation? A cohort study in Melbourne, Australia**

Lisa H Amir<sup>1</sup>, Susan M Donath<sup>2</sup>, Suzanne M Garland<sup>2,3</sup>, Sepehr N Tabrizi<sup>2,3</sup>, Catherine M Bennett<sup>4</sup>, Meabh Cullinane<sup>1</sup>, Matthew S Payne<sup>1,5</sup>

<sup>1</sup>Mother & Child Health Research, La Trobe University, Melbourne, VIC, Australia

<sup>2</sup>Murdoch Childrens Research Institute, Melbourne, VIC, Australia

<sup>3</sup>Department of Molecular Microbiology, Microbiology and Infectious Diseases, Royal Women's Hospital and Department of Obstetrics and Gynaecology, University of Melbourne, VIC, Australia

<sup>4</sup>Deakin Population Health, Deakin University, Burwood, VIC, Australia

<sup>5</sup>School of Women's and Infants' Health, University of Western Australia, WA, Australia

**Article summary****Article Focus**

- Controversy about the condition known as "breast thrush" or breast candidiasis in lactating women has led to confusion among clinicians and the community.
- Previous studies have been cross-sectional.
- This is the first prospective longitudinal study to examine simultaneously both *S. aureus* and *Candida* spp. in breast infections and was designed to resolve the current controversy surrounding which is the primary organism responsible for the condition known as "breast thrush": *Candida* spp. or *S. aureus*?

**Key Messages**

- *Candida* spp. is associated with burning nipple pain and breast pain.

- 1  
2  
3 • Colonisation with *S. aureus* is common; at least 50% of women were colonised with *S.*  
4  
5 *aureus* in nipple or milk samples by four weeks postpartum.  
6  
7

### 8 9 10 **Strengths and Limitations**

- 11 • The evidence of microbiological data from this large cohort of women over four weeks  
12  
13 postpartum is stronger than previous smaller cross-sectional studies.  
14  
15 • *Candida* spp. were more commonly identified using more sensitive molecular techniques  
16  
17 (real-time PCR) than by using standard microbiological culture techniques.  
18  
19 • As these techniques are not used in clinical practice currently, clinicians should continue  
20  
21 to use their clinical skills to diagnose causes of nipple and breast pain in lactating women.  
22  
23  
24  
25  
26  
27  
28  
29  
30  
31  
32  
33

### 34 35 **Abstract**

36  
37 **Objective:** To investigate *Candida* species and *Staphylococcus aureus* and the development  
38  
39 of “nipple and breast thrush” among breastfeeding women.  
40

41  
42 **Design:** Prospective longitudinal cohort study.

43  
44 **Setting:** Two hospitals in Melbourne, Australia (one public, one private) with follow-up in  
45  
46 the community.  
47

48  
49 **Participants:** 360 nulliparous women recruited at  $\geq 36$  weeks gestation from November 2009  
50  
51 to June 2011. Participants were followed-up six times: in hospital, at home weekly until four  
52  
53 weeks postpartum and by telephone at eight weeks.  
54

55  
56 **Main outcome measures:** Case definition “nipple and breast thrush”: burning nipple pain  
57  
58 and breast pain (not related to mastitis); detection of *Candida* spp. (using culture and PCR)  
59  
60



1  
2  
3 from the mother's vagina, nipple or breast milk or baby's mouth; detection of *S. aureus* from  
4  
5 the mother's nipple or breast milk.  
6

7 **Results:** Women with the case definition of nipple/breast thrush were more likely to have  
8  
9 *Candida* spp. in nipple/breast milk/baby oral samples (54%) compared to other women (36%,  
10  
11  $p = 0.014$ ). *S. aureus* was common in nipple/breast milk/baby samples of women with these  
12  
13 symptoms as well as women without these symptoms (82% vs 79%) ( $p = 0.597$ ). Time-to-  
14  
15 event analysis examined predictors of nipple/breast thrush up to and including the time of  
16  
17 data collection. *Candida* in nipple/breast milk/baby predicted incidence of the case definition  
18  
19 (Rate Ratio 1.87 (95% CI: 1.10, 3.16,  $p = 0.018$ ). We don't have evidence that *S. aureus*  
20  
21 colonisation was a predictor of these symptoms (RR 1.53, 95% CI: 0.88, 2.64,  $p = 0.13$ ).  
22  
23 Nipple damage was also a predictor of these symptoms, RR 2.30 (95% CI: 1.19, 4.43,  $p =$   
24  
25 0.012). In the multivariate model, with all three predictors, the Rate Ratios were very similar  
26  
27 to the univariate Rate Ratios. This indicates that *Candida* and nipple damage are independent  
28  
29 predictors of our case definition.  
30  
31  
32  
33  
34  
35  
36  
37  
38  
39

## 40 **Background**

41 Controversy about the condition known as "breast thrush" or breast candidiasis in lactating  
42  
43 women has led to confusion among clinicians and the community. While some clinicians may  
44  
45 diagnose and treat this condition in breastfeeding women with deep, radiating breast pain  
46  
47 associated with burning nipple pain,<sup>1-6</sup> others doubt the relationship with fungal organisms<sup>7-11</sup>  
48  
49 and decry "the alarming trend towards believing that fungi are important in the aetiology of  
50  
51 breast infection and deep breast pain associated with breast feeding, despite a lack of good  
52  
53 quality evidence".<sup>11</sup> p. 485.  
54  
55  
56  
57  
58  
59  
60

1  
2  
3 Unlike mastitis which is diagnosed when a breastfeeding woman experiences inflammation  
4 of the breast associated with systemic symptoms,<sup>12</sup> breast thrush is usually diagnosed when  
5 the breast is not erythematous or indurated, and the woman is afebrile and systemically well  
6 apart from a typical burning pain radiating into the breast and/or into the back.<sup>4</sup> While some  
7 authors use the term ‘candida mastitis’,<sup>6 11 13</sup> we feel this is misleading, as inflammation of  
8 the breast is not evident. Although some clinicians attribute the pain to infection with  
9 *Staphylococcus aureus* (*S. aureus*) and treat women with long-term antibiotics,<sup>14</sup> this has not  
10 been tested in trials.  
11  
12  
13  
14  
15  
16  
17  
18  
19  
20

21  
22  
23 The primary cause of the nipple pain or damage is often the process of breastfeeding itself:  
24 trauma from the infant’s mouth due to incorrect attachment, or infant anatomy or  
25 dysfunctional suck.<sup>15</sup> Nipple thrush is usually diagnosed when the nipple/areola is slightly  
26 pink, sensitive to touch, and the pain described is out of proportion to the damage seen on  
27 clinical examination.<sup>4</sup> When the areola is described as itchy and appears red and/or crusty, the  
28 diagnosis is dermatitis/eczema rather than fungal infection.<sup>16</sup> A nipple with obvious damage  
29 is almost certainly colonised with *S. aureus*.<sup>17</sup> Nipple/breast pain associated with nipple  
30 blanching persisting for longer than a few seconds is likely to be nipple vasospasm; this  
31 condition is commonly confused with breast thrush because of the burning, radiating nature  
32 of the pain.<sup>18 19</sup> The pain from vasospasm is often secondary to nipple damage or infection,  
33 exacerbated by cold, and relieved by heat or nifedipine.<sup>20</sup> In practice, more than one cause of  
34 nipple or breast pain is commonly present,<sup>6</sup> which makes it difficult to construct a case  
35 definition for “breast thrush” for research purposes.  
36  
37  
38  
39  
40  
41  
42  
43  
44  
45  
46  
47  
48  
49  
50  
51

52  
53  
54 Previous breastfeeding studies have been largely cross-sectional,<sup>1 7 9 10</sup> whilst one longitudinal  
55 study collected microbiological data, but no clinical information.<sup>21</sup> This is the first  
56  
57  
58  
59  
60

1  
2  
3 prospective longitudinal study examining both *S. aureus* and *Candida* spp. in breast  
4  
5 infections and was designed to resolve the current controversy surrounding which is the  
6  
7 primary organism responsible for the condition known as “breast thrush”: *Candida* spp. or *S.*  
8  
9 *aureus*?  
10

## 11 12 13 14 **Methods**

15  
16  
17 The CASTLE (Candida and Staphylococcus Transmission: Longitudinal Evaluation) study  
18  
19 was a prospective longitudinal descriptive study; details have been published in the study  
20  
21 protocol.<sup>22</sup> A cohort of 360 nulliparous women planning to breastfeed for at least two months  
22  
23 were recruited at  $\geq 36$  weeks gestation from two hospitals in Melbourne, Australia  
24  
25 (November 2009 to June 2011). At recruitment, nasal, nipple (both breasts) and vaginal  
26  
27 swabs were collected and participants completed a questionnaire asking about previous  
28  
29 staphylococcal and candida infections. Following birth, participants were followed-up six  
30  
31 times: face-to-face in hospital, then weekly at home until four weeks postpartum. Participants  
32  
33 filled out a questionnaire at each time point to collect information about breastfeeding  
34  
35 problems and postpartum health problems. At each visit, maternal nasal, and nipple swabs  
36  
37 and breast milk samples (both breasts) and infant oral and nasal swabs were collected. At a  
38  
39 final telephone interview at eight weeks postpartum information about breastfeeding  
40  
41 problems and postpartum health was collected.  
42  
43  
44  
45

46  
47  
48 Specimens were collected by research assistants. Fresh gloves were worn for each specimen.  
49  
50 After sanitising their hands, research assistants collected nipple swabs then washed the  
51  
52 nipple/areola region twice using sterile water wipes. Mid-stream milk was collected into a  
53  
54 sterile container; the first drops of breast milk were expressed and discarded. Two nipple  
55  
56 swabs were obtained from each nipple; a standard charcoal swab for microbiological analysis  
57  
58  
59  
60

1  
2  
3 (Copan Diagnostics Inc. CA, USA) and a flocked swab for molecular analysis (Copan  
4 Diagnostics Inc. CA, USA). After first moistening in sterile saline, both the standard and  
5 flocked nipple swabs were rolled over the nipple and areola together using a 10-point  
6 swabbing technique,<sup>23</sup> paying particular attention to any cracks / fissures present. Oral and  
7 vaginal swabs were collected for culture of *S. aureus* and *Candida* spp. Breast milk samples  
8 were also cultured for *S. aureus*, coagulase-negative staphylococci (CoNS) and *Candida* spp;  
9 nasal swabs were collected for culture of *S. aureus* only.  
10  
11  
12  
13  
14  
15  
16  
17  
18  
19

20  
21 In studies conducted in women with vulvovaginal symptoms, molecular microbiological  
22 techniques have been useful in detecting *Candida* in women who were negative using  
23 standard microbiology.<sup>24 25</sup> Therefore we planned to use molecular techniques to increase  
24 detection of *Candida* spp. in nipple specimens.<sup>22</sup> Due to cost constraints we did not plan to  
25 use molecular techniques for the milk specimens (up to 4000 specimens). As participants  
26 only had one or two vaginal specimens we extracted DNA from vaginal as well as nipple  
27 swabs for molecular identification of *Candida* spp. using real-time PCR.<sup>22</sup>  
28  
29  
30  
31  
32  
33  
34  
35  
36  
37

38 At each contact, women were asked about nipple pain (“In the last 48 hours, have you been  
39 experiencing **nipple** pain/discomfort?) and whether it was burning in quality (“If yes, would  
40 you describe your nipple pain as burning?”), clinical signs and symptoms of mastitis as used  
41 in previous research (i.e. redness, fever, etc.),<sup>26</sup> and other types of breast pain (“Have you had  
42 **other** breast pain in the last 2 days? No/ I have had stabbing (radiating or shooting) breast  
43 pain **only**/ I have had non-stabbing breast pain **only**/ I have had both stabbing and non-  
44 stabbing breast pain”). We also asked “Do you have nipple vasospasm? (Nipple blanches or  
45 goes white in the cold or during/after feeds) No/ Yes, for less than 5 minutes/ Yes, for more  
46 than 5 minutes/ Not sure”). Researchers also collected clinical observations of nipple/areola  
47  
48  
49  
50  
51  
52  
53  
54  
55  
56  
57  
58  
59  
60

1  
2  
3 and breast at each visit (weeks 1 to 4), including colour of nipple/areola. Our case definition  
4  
5 of "nipple and breast thrush" used a combination of burning nipple pain and breast pain  
6  
7 (non-mastitis). Francis-Morrill et al found nipple appearance ("shiny" or flaky" nipple or pink  
8  
9 colour) to be predictive of *Candida*.<sup>27</sup> However, in our study very few women were described  
10  
11 as having these appearances (shiny, n = 4, flaky, n = 17), while 140 women were described as  
12  
13 having "pink" nipple/s. Adding the appearance identifiers to our case definition was not  
14  
15 helpful. Clinically, the symptoms of nipple and breast thrush develop after the first week  
16  
17 postpartum, and since most pain in the first week postpartum in first time mothers is likely to  
18  
19 be due to adjusting to breastfeeding, we examined the case definition at weeks 1 to 8, and  
20  
21 weeks 2 to 8 separately.  
22  
23  
24  
25  
26

27  
28 Statistical analysis was conducted using Stata Version 12. Hypothesis 1 — Women with  
29  
30 nipple/breast thrush are more likely to have *Candida* spp. isolated than other women;  
31  
32 hypothesis 2 — Women with nipple/breast thrush are more likely to have *S. aureus* isolated  
33  
34 than other women. A sample of 318 women was estimated to provide adequate power.<sup>22</sup> Chi-  
35  
36 squared tests were used for comparing categorical variables. We investigated incidence of  
37  
38 nipple/breast thrush using a multivariable discrete version of the proportional hazards  
39  
40 regression model.<sup>28</sup> Outcome variable was the incidence of new cases of our nipple and  
41  
42 breast thrush definition; time-varying predictors were: the presence of *Candida* spp., presence  
43  
44 of *S. aureus* and mother-reported nipple damage. We present crude Rate Ratios (RR), and  
45  
46 multivariate analysis, adjusting for the presence of *Candida* spp, *S. aureus* and nipple  
47  
48 damage.  
49  
50  
51  
52  
53

54 Results relating to mastitis, other breastfeeding and postpartum problems will be published  
55  
56 separately (papers in preparation).  
57  
58  
59  
60

## Results

Fourteen women withdrew from the study after giving birth, leaving 346 (96%) women available for data collection at subsequent visits; 340 (94%) women completed the study at 8 weeks postpartum. Women who participated in the study were highly educated (77% had tertiary degree or higher) and most were married or lived with their partner (96%) (Table 1). Just over half gave birth in the private hospital (56%), 45% by Caesarean section.

Burning nipple pain was reported by 42% of women (146/346) during weeks 1 to 8, or 32% women (111/346) during weeks 2 to 8. Radiating or non-radiating breast pain (not related to engorgement/mastitis) was reported by 54% of women (186/346) during weeks 1 to 8, or 47% of women (162/346) during weeks 2 to 8. Combining these symptoms to estimate the proportion of women with both burning nipple pain and non-mastitis breast pain (at the same time): 19% of women in weeks 1 to 8 (65/346), or 15% in weeks 2 to 8 (50/346).

*Candida albicans* was the most commonly isolated *Candida* spp in culture with *Candida glabrata* only isolated in one nipple specimen and one milk sample (Table 2). Although "other *Candida* spp." were found, none speciated as *Candida krusei* or *Candida kefyr*. *Candida* PCR of the nipple was positive for *Candida* spp. in 33% of women (115/346); in contrast to culture of only 3% of women (9/346) being positive for *Candida* spp.. *Candida* spp. were isolated by culture from breast milk samples from 5% women (18/346), but no molecular analyses were conducted on these samples. Table 3 shows *Candida* isolated by culture and by PCR at each visit. *S. aureus* was isolated by culture from the nipple and/or breast milk in 67% of women (231/346), and from nose and/or mouth of 73% of infants (253/346) at some point during follow-up. There were 22 milk samples positive for *Candida*,

1  
2  
3 of which 10 were milk only, and 12 were positive for nipple and milk. For *S. aureus*, 425  
4  
5 milk samples were positive, of which 89 were positive in milk only.  
6  
7

8  
9  
10 Burning nipple pain was very common in week 1, primarily as women adjusted to  
11 breastfeeding, therefore we explored the relationship between *Candida* spp. and *S. aureus*  
12 using two case definitions: weeks 1-8 and weeks 2-8 (Table 4). There was a statistically  
13 significant association between these symptoms in weeks 2-8 and *Candida* spp. in  
14 nipple/breast milk/baby ( $p = 0.014$ ); as also for *Candida* spp. in vagina/nipple/breast  
15 milk/baby ( $p = 0.047$ , not shown). *S. aureus* was common in nipple/breast milk/baby samples  
16 of women with these symptoms as well as women without these symptoms (82% vs 79%) ( $p$   
17 = 0.597, Table 4).  
18  
19  
20  
21  
22  
23  
24  
25  
26  
27

28  
29 As women with nipple vasospasm describe a burning, radiating pain, we also analysed the  
30 case definition excluding women with vasospasm (see Table 4). Only two women were  
31 removed from the analysis ( $n = 48$ ), which made little difference to the results.  
32  
33  
34  
35  
36  
37

38 Time-to-event analysis examined predictors of our case definition of nipple/breast thrush  
39 (burning nipple and breast pain [non-mastitis]) up to and including the time of data collection  
40 in the first four weeks. (See unadjusted survival curves: Figures 1, 2 and 3 and Table 5).  
41  
42  
43  
44  
45  
46  
47  
48  
49  
50  
51  
52  
53  
54  
55  
56  
57  
58  
59  
60  
61  
62  
63  
64  
65  
66  
67  
68  
69  
70  
71  
72  
73  
74  
75  
76  
77  
78  
79  
80  
81  
82  
83  
84  
85  
86  
87  
88  
89  
90  
91  
92  
93  
94  
95  
96  
97  
98  
99  
100  
101  
102  
103  
104  
105  
106  
107  
108  
109  
110  
111  
112  
113  
114  
115  
116  
117  
118  
119  
120  
121  
122  
123  
124  
125  
126  
127  
128  
129  
130  
131  
132  
133  
134  
135  
136  
137  
138  
139  
140  
141  
142  
143  
144  
145  
146  
147  
148  
149  
150  
151  
152  
153  
154  
155  
156  
157  
158  
159  
160  
161  
162  
163  
164  
165  
166  
167  
168  
169  
170  
171  
172  
173  
174  
175  
176  
177  
178  
179  
180  
181  
182  
183  
184  
185  
186  
187  
188  
189  
190  
191  
192  
193  
194  
195  
196  
197  
198  
199  
200  
201  
202  
203  
204  
205  
206  
207  
208  
209  
210  
211  
212  
213  
214  
215  
216  
217  
218  
219  
220  
221  
222  
223  
224  
225  
226  
227  
228  
229  
230  
231  
232  
233  
234  
235  
236  
237  
238  
239  
240  
241  
242  
243  
244  
245  
246  
247  
248  
249  
250  
251  
252  
253  
254  
255  
256  
257  
258  
259  
260  
261  
262  
263  
264  
265  
266  
267  
268  
269  
270  
271  
272  
273  
274  
275  
276  
277  
278  
279  
280  
281  
282  
283  
284  
285  
286  
287  
288  
289  
290  
291  
292  
293  
294  
295  
296  
297  
298  
299  
300  
301  
302  
303  
304  
305  
306  
307  
308  
309  
310  
311  
312  
313  
314  
315  
316  
317  
318  
319  
320  
321  
322  
323  
324  
325  
326  
327  
328  
329  
330  
331  
332  
333  
334  
335  
336  
337  
338  
339  
340  
341  
342  
343  
344  
345  
346  
347  
348  
349  
350  
351  
352  
353  
354  
355  
356  
357  
358  
359  
360  
361  
362  
363  
364  
365  
366  
367  
368  
369  
370  
371  
372  
373  
374  
375  
376  
377  
378  
379  
380  
381  
382  
383  
384  
385  
386  
387  
388  
389  
390  
391  
392  
393  
394  
395  
396  
397  
398  
399  
400  
401  
402  
403  
404  
405  
406  
407  
408  
409  
410  
411  
412  
413  
414  
415  
416  
417  
418  
419  
420  
421  
422  
423  
424  
425  
426  
427  
428  
429  
430  
431  
432  
433  
434  
435  
436  
437  
438  
439  
440  
441  
442  
443  
444  
445  
446  
447  
448  
449  
450  
451  
452  
453  
454  
455  
456  
457  
458  
459  
460  
461  
462  
463  
464  
465  
466  
467  
468  
469  
470  
471  
472  
473  
474  
475  
476  
477  
478  
479  
480  
481  
482  
483  
484  
485  
486  
487  
488  
489  
490  
491  
492  
493  
494  
495  
496  
497  
498  
499  
500  
501  
502  
503  
504  
505  
506  
507  
508  
509  
510  
511  
512  
513  
514  
515  
516  
517  
518  
519  
520  
521  
522  
523  
524  
525  
526  
527  
528  
529  
530  
531  
532  
533  
534  
535  
536  
537  
538  
539  
540  
541  
542  
543  
544  
545  
546  
547  
548  
549  
550  
551  
552  
553  
554  
555  
556  
557  
558  
559  
560  
561  
562  
563  
564  
565  
566  
567  
568  
569  
570  
571  
572  
573  
574  
575  
576  
577  
578  
579  
580  
581  
582  
583  
584  
585  
586  
587  
588  
589  
590  
591  
592  
593  
594  
595  
596  
597  
598  
599  
600  
601  
602  
603  
604  
605  
606  
607  
608  
609  
610  
611  
612  
613  
614  
615  
616  
617  
618  
619  
620  
621  
622  
623  
624  
625  
626  
627  
628  
629  
630  
631  
632  
633  
634  
635  
636  
637  
638  
639  
640  
641  
642  
643  
644  
645  
646  
647  
648  
649  
650  
651  
652  
653  
654  
655  
656  
657  
658  
659  
660  
661  
662  
663  
664  
665  
666  
667  
668  
669  
670  
671  
672  
673  
674  
675  
676  
677  
678  
679  
680  
681  
682  
683  
684  
685  
686  
687  
688  
689  
690  
691  
692  
693  
694  
695  
696  
697  
698  
699  
700  
701  
702  
703  
704  
705  
706  
707  
708  
709  
710  
711  
712  
713  
714  
715  
716  
717  
718  
719  
720  
721  
722  
723  
724  
725  
726  
727  
728  
729  
730  
731  
732  
733  
734  
735  
736  
737  
738  
739  
740  
741  
742  
743  
744  
745  
746  
747  
748  
749  
750  
751  
752  
753  
754  
755  
756  
757  
758  
759  
760  
761  
762  
763  
764  
765  
766  
767  
768  
769  
770  
771  
772  
773  
774  
775  
776  
777  
778  
779  
780  
781  
782  
783  
784  
785  
786  
787  
788  
789  
790  
791  
792  
793  
794  
795  
796  
797  
798  
799  
800  
801  
802  
803  
804  
805  
806  
807  
808  
809  
810  
811  
812  
813  
814  
815  
816  
817  
818  
819  
820  
821  
822  
823  
824  
825  
826  
827  
828  
829  
830  
831  
832  
833  
834  
835  
836  
837  
838  
839  
840  
841  
842  
843  
844  
845  
846  
847  
848  
849  
850  
851  
852  
853  
854  
855  
856  
857  
858  
859  
860  
861  
862  
863  
864  
865  
866  
867  
868  
869  
870  
871  
872  
873  
874  
875  
876  
877  
878  
879  
880  
881  
882  
883  
884  
885  
886  
887  
888  
889  
890  
891  
892  
893  
894  
895  
896  
897  
898  
899  
900  
901  
902  
903  
904  
905  
906  
907  
908  
909  
910  
911  
912  
913  
914  
915  
916  
917  
918  
919  
920  
921  
922  
923  
924  
925  
926  
927  
928  
929  
930  
931  
932  
933  
934  
935  
936  
937  
938  
939  
940  
941  
942  
943  
944  
945  
946  
947  
948  
949  
950  
951  
952  
953  
954  
955  
956  
957  
958  
959  
960  
961  
962  
963  
964  
965  
966  
967  
968  
969  
970  
971  
972  
973  
974  
975  
976  
977  
978  
979  
980  
981  
982  
983  
984  
985  
986  
987  
988  
989  
990  
991  
992  
993  
994  
995  
996  
997  
998  
999  
1000

Candida in nipple/breast milk/baby predicted incidence of the case definition (Rate Ratio 1.87 (95% CI: 1.10, 3.16,  $p = 0.018$ ). Thus, for women with *Candida* in nipple/milk/baby at any time point, the rate of subsequently developing the case definition was increased by 87%, compared to women without *Candida*. The evidence for *S. aureus* colonisation as a predictor of these symptoms was not strong (RR 1.53, 95% CI: 0.88, 2.64,  $p = 0.13$ ). Mothers' report of nipple damage was a predictor of these symptoms, with a RR 2.30 (95% CI: 1.19, 4.43,  $p$

1  
2  
3 = 0.012). In the multivariate model, with all three predictors, the Rate Ratios were very  
4  
5 similar to the univariate Rate Ratios. This indicates that *Candida* and nipple damage are  
6  
7 independent predictors of our case definition.  
8  
9

## 10 11 12 **Discussion**

### 13 14 15 **Principal findings**

16  
17 Unlike some cross-sectional studies which found no relationship between the presence of  
18  
19 *Candida* spp. and the condition known as breast thrush,<sup>9 10</sup> we have shown that *Candida* spp.  
20  
21 is associated with burning nipple pain and breast pain – in two analyses (‘at any time’ and  
22  
23 ‘time-to-event’). As in previous studies,<sup>1 7</sup> we uncommonly isolated *Candida* spp. on the  
24  
25 nipple using standard microbiological culture techniques. However, *Candida* spp. were more  
26  
27 commonly identified using more sensitive molecular techniques (real-time PCR). This test is  
28  
29 not used in routine practice currently, and therefore it is not helpful in making the diagnosis  
30  
31 in clinical care at this time. *Candida* spp. were also rarely isolated in breast milk, using  
32  
33 standard techniques. It is possible that the isolation rate would have been higher if we had  
34  
35 used the technique of Morrill and colleagues, who added iron to inactivate milk lactoferrin.<sup>29</sup>  
36  
37 However, Hale et al were unable to identify *Candida* in breast milk of women with ‘*Candida*  
38  
39 mastitis’ using culture and another specific technique (presence of 1→3-β-D-glucan).<sup>10</sup> The  
40  
41 16 cases had ‘sore, inflamed, or traumatized nipples, intense stabbing or burning pain that  
42  
43 radiated into the axilla often persisting after feeding, and painful feeding without alternate  
44  
45 diagnosis’.<sup>10</sup> Possible explanations for Hale et al’s findings are that the women had other  
46  
47 causes of their pain (from the traumatised nipple, from maternal vasospasm, or infant  
48  
49 posterior tongue-tie or other mechanical causes of pain); that *Candida* was present in the  
50  
51 nipple (samples were only collected from the milk), or that *Candida* is not present in the milk  
52  
53 of women with this syndrome. The question as to whether *Candida* is present in the  
54  
55  
56  
57  
58  
59  
60



1  
2  
3 lactiferous ducts is still open to debate; what we have shown is a link between *Candida* and  
4  
5 nipple/breast pain – independent of the presence of nipple damage or *S. aureus*.  
6  
7

8  
9  
10 *Candida* spp. are commensal organisms, and therefore the presence of *Candida* spp. does not  
11  
12 always imply infection. Recent understanding of vulvovaginitis postulates that the threshold  
13  
14 number of organisms for symptomatic vaginitis varies for different groups of women; women  
15  
16 with infrequent vaginitis have a higher threshold.<sup>30</sup> Furthermore, the symptoms associated  
17  
18 with vaginitis may be caused by the host neutrophil response; small numbers of organisms  
19  
20 may promote an aggressive inflammatory response in some women.<sup>30</sup>  
21  
22

23  
24  
25  
26  
27 Consistent with other studies of mothers and infants,<sup>21 31-34</sup> colonisation with *S. aureus* is  
28  
29 common; at least 50% of women were colonised with *S. aureus* in nipple or milk samples by  
30  
31 four weeks postpartum. Therefore in clinical practice, a finding of *S. aureus* on the nipple or  
32  
33 breast milk is not evidence that the bacteria are the principal cause of the woman's pain. Our  
34  
35 analysis indicates that *Candida* and *S. aureus* are acting independently, despite often co-  
36  
37 existing. The case-control study of women with a clinical diagnosis of nipple and breast  
38  
39 thrush by Panjaitan and colleagues which only used molecular techniques from nipple swabs  
40  
41 and excluded women with clinical signs of bacterial infection (exudate on nipple or inflamed  
42  
43 breast), found that *S. aureus* was present in equal numbers of cases and controls.<sup>35</sup>  
44  
45  
46  
47  
48

### 49 50 **Clinical implications**

51  
52 Diagnostic skills are needed to make the diagnosis of nipple/breast candidiasis; clinicians  
53  
54 should routinely consider all causes of nipple and breast pain, in the same way they consider  
55  
56 differential diagnoses when assessing a patient with chest pain.<sup>36</sup> Women with nipple damage  
57  
58  
59  
60

1  
2  
3 or with nipple vasospasm describe pain that is burning in quality; in the past this has often  
4  
5 been misdiagnosed as Candida infection.<sup>37</sup> The pain clinically associated with Candida  
6  
7 infection is persistent, ranges from mild to severe, and is not relieved by the use of nipple  
8  
9 shields or expressing/pumping, or applying heat. When the pain is related directly to infant  
10  
11 feeding the cause is likely to be mechanical, and when the pain is relieved by heat, vasospasm  
12  
13 is the likely cause.<sup>19</sup> We found that nipple damage was associated with burning nipple and  
14  
15 radiating breast pain, so clinicians should be cautious about diagnosing infection (whether  
16  
17 fungal or bacterial) in every woman with nipple damage.  
18  
19  
20  
21  
22

### 23 **Strengths and limitations**

24  
25 The strength of this study is that a cohort of healthy women who had not previously breastfed  
26  
27 was recruited prior to commencing breastfeeding and was followed closely until two months  
28  
29 postpartum. It is the first prospective longitudinal study to examine simultaneously both *S.*  
30  
31 *aureus* and *Candida* spp. in a cohort of breastfeeding women and their infants.  
32  
33  
34  
35

36 The main limitation is that we did not have a clinical diagnosis of nipple/breast thrush and  
37  
38 had to use a case definition based on two symptoms to estimate this condition. Participants  
39  
40 responded to questions about pain and nipple blanching, and research assistants reported  
41  
42 nipple appearance, but these measures could not substitute for a clinical assessment.  
43  
44 Furthermore infant oral anatomy was not examined to exclude tongue-tie, and breastfeeds  
45  
46 were not observed. We are not implying that all women with burning nipple and breast pain  
47  
48 had a clinical diagnosis of nipple/breast thrush. We hypothesise that *Candida* is associated  
49  
50 with nipple/breast pain in some women, in a similar manner to the relationship between  
51  
52 *Candida* and vulvovaginal symptoms: *Candida* is a commensal in some women, while other  
53  
54 women experience significant pain when only small numbers of organisms are present.<sup>30</sup>  
55  
56  
57  
58  
59  
60

Another limitation is that we only followed the cohort for eight weeks postpartum – with microbiological data to only four weeks postpartum; women who developed problems after this time period were not captured in our data collection.

## Conclusions

This large cohort study provides evidence that *Candida* spp. play a role in nipple and breast pain in lactating women, however, burning nipple pain is common in breastfeeding women, and a diagnosis of *Candida* spp. infection should not be made without considering differential diagnoses.<sup>4</sup> Further research into the role of staphylococci in breast pain in lactating women with inflammatory symptoms and without is needed. Animal models, as have been used in vulvovaginal candidiasis,<sup>30</sup> may be required to fully understand the pathogenesis of this condition. Future researchers may consider the RCTs for treatment or clearance of *Candida*.

## References

1. Amir LH, Garland SM, Dennerstein L, et al. *Candida albicans*: is it associated with nipple pain in lactating women? *Gynecol Obstet Invest* 1996;41(1):30-34.
2. Montgomery AM. Breastfeeding and postpartum maternal care. *Prim Care* 2000;27(1):237-50.
3. Brent NB. Thrush in the breastfeeding dyad: results of a survey on diagnosis and treatment. *Clin Pediatr (Phila)* 2001;40(9):503-06.
4. Moorhead AM, Amir LH, O'Brien PW, et al. A prospective study of fluconazole treatment for breast and nipple thrush. *Breastfeed Rev* 2011;19(3):25-29.
5. Hoddinott P, Tappin D, Wright C. Breast feeding. *BMJ* 2008;336(7649):881-87.
6. Heller MM, Fullerton-Stone H, Murase JE. Caring for new mothers: diagnosis, management and treatment of nipple dermatitis in breastfeeding mothers. *Int J Dermatol* 2012;51(10):1149-61.
7. Thomassen P, Johansson VA, Wassberg C, et al. Breast-feeding, pain and infection. *Gynecol Obstet Invest* 1998;46(2):73-74.
8. Carmichael AR, Dixon JM. Is lactation mastitis and shooting breast pain experienced by women during lactation caused by *Candida albicans*? *Breast* 2002;11:88-90.

9. Graves S, Wright W, Harman R, et al. Painful nipples in nursing mothers: Fungal or staphylococcal? A preliminary study. *Aust Fam Physician* 2003;32(7):570-71.
10. Hale TW, Bateman TL, Finkelman MA, et al. The absence of *Candida albicans* in milk samples of women with clinical symptoms of ductal candidiasis. *Breastfeed Med* 2009;4(2):57-61.
11. Dixon JM, Khan LR. Treatment of breast infection. *BMJ* 2011;342:484-89.
12. Amir LH, The Academy of Breastfeeding Medicine Protocol Committee. ABM Clinical Protocol # 4: Mastitis, Revision, May 2008. *Breastfeed Med* 2008;3(3):177-80.
13. Hanna L, Cruz SA. *Candida* mastitis: a case report. *Perm J* 2011;15(1):62-64.
14. Eglash A, Plane MB, Mundt M. History, physical and laboratory findings, and clinical outcomes of lactating women treated with antibiotics for chronic breast and/or nipple pain. *J Hum Lact* 2006;22(4):429-33.
15. Watson Genna C. The influence of anatomical and structural issues on sucking skills. In: Watson Genna C, editor. *Supporting Sucking Skills in Breastfeeding Infants*. Sudbury, Massachusetts: Jones and Bartlett Publishers, 2008:181-226.
16. Barankin B, Gross MS. Nipple and areolar eczema in the breastfeeding woman. *J Cutan Med Surg* 2004;8(2):126-30.
17. Livingstone V, Stringer LJ. The treatment of *Staphylococcus aureus* infected sore nipples: A randomized comparative study. *J Hum Lact* 1999;15(3):241-46.
18. Page SM, McKenna DS. Vasospasm of the nipple presenting as painful lactation. *Obstet Gynec* 2006;108(3):806-08.
19. Amir LH. Breast pain in lactating women - mastitis or something else? *Aust Fam Physician* 2003;32(3):141-45.
20. Anderson JE, Held N, Wright K. Raynaud's phenomenon of the nipple: a treatable cause of painful breastfeeding. *Pediatrics* 2004;113(4):e360-4.
21. Peacock SJ, Justice A, Griffiths D, et al. Determinants of acquisition and carriage of *Staphylococcus aureus* in infancy. *J Clin Microbiol* 2003;41(12):5718-25.
22. Amir LH, Cullinane M, Garland SM, et al. The role of micro-organisms (*Staphylococcus aureus* and *Candida albicans*) in the pathogenesis of breast pain and infection in lactating women: study protocol. *BMC Pregnancy Childbirth* 2011;11:54.
23. Stuebe A. Lactation culture protocol [http://www.mombaby.org/PDF/culture\\_protocol.2.0.pdf](http://www.mombaby.org/PDF/culture_protocol.2.0.pdf), 2011.
24. Weissenbacher T, Witkin SS, Ledger WJ, et al. Relationship between clinical diagnosis of recurrent vulvovaginal candidiasis and detection of *Candida* species by culture and polymerase chain reaction. *Arch Gynecol Obstet* 2009;279(2):125-29.
25. Tabrizi SN, Pirota MV, Rudland E, et al. Detection of *Candida* species by PCR in self-collected vaginal swabs of women after taking antibiotics (Letter). *Mycoses* 2006;49:523-24.
26. Amir LH, Forster DA, Lumley J, et al. A descriptive study of mastitis in Australian breastfeeding women: incidence and determinants. *BMC Public Health* 2007;7:62.
27. Francis-Morrill J, Heinig MJ, Pappagianis D, et al. Diagnostic value of signs and symptoms of mammary candidosis among lactating women. *J Hum Lact* 2004;20(3):288-95.
28. Carlin JB, Wolfe R, Coffey C, et al. Analysis of binary outcomes in longitudinal studies using weighted estimating equations and discrete-time survival methods: prevalence and incidence of smoking in an adolescent cohort. *Statistics in medicine* 1999;18(19):2655-79.
29. Morrill JF, Pappagianis D, Heinig MJ, et al. Detecting *Candida albicans* in human milk. *J Clin Microbiol* 2003;41(1):475-78.

- 1
- 2
- 3 30. Fidel PLJ. History and update on host defense against vaginal candidiasis. *Am J Reprod*
- 4 *Immunol* 2007;57(1):2-12.
- 5 31. Amir LH, Garland SM, Lumley J. A case-control study of mastitis: nasal carriage of
- 6 *Staphylococcus aureus*. *BMC Fam Pract* 2006;7:57.
- 7 32. Kawada M, Okuzumi K, Hitomi S, et al. Transmission of *Staphylococcus aureus* between
- 8 healthy, lactating mothers and their infants by breastfeeding. *J Hum Lact*
- 9 2003;19(4):411-17.
- 10 33. Jimenez-Truque N, Tedeschi S, Saye EJ, et al et al. Relationship between maternal and
- 11 neonatal *Staphylococcus aureus* colonization. *Pediatrics* 2012;129(5):e1252-9.
- 12 34. Leshem E, Maayan-Metzger A, Rahav G, et al. Transmission of *Staphylococcus aureus*
- 13 from mothers to newborns. *Pediatr Infect Dis J* 2012;31(4):360-3.
- 14 35. Panjaitan M, Amir LH, Costa A-M, et al. Polymerase chain reaction in detection of
- 15 *Candida albicans* for confirmation of clinical diagnosis of nipple thrush (Letter).
- 16 *Breastfeed Med* 2008;3(3):185-87.
- 17 36. Yelland M, Cayley WE, Jr., et al. An algorithm for the diagnosis and management of
- 18 chest pain in primary care. *Med Clin North Am* 2010;94(2):349-74.
- 19 37. Morino C, Winn SM. Raynaud's phenomenon of the nipples: an elusive diagnosis. *J Hum*
- 20 *Lact* 2007;23(2):191-93.
- 21
- 22
- 23
- 24
- 25

26 Contributors: LHA conceived the study, which was designed in collaboration with all  
27 authors. SMD managed the data and conducted the statistical analyses. SMG, SNT, CMB and  
28 MSP provided microbiological expertise. MC was the project co-ordinator. MSP was the  
29 research scientist.

30 Competing interests: All authors have completed the ICMJE uniform disclosure form at  
31 [www.icjme.org/coi\\_disclosure.pdf](http://www.icjme.org/coi_disclosure.pdf) (available on request from the corresponding author) and  
32 declare that: this stud received financial support from the National Health & Medical  
33 Research Council (NHMRC) (project grant 541907, equipment grant, Health Professional  
34 Training Fellowship (LHA)), Helen Mcpherson Smith Trust, Faculty Research Grant, Faculty  
35 of Health Sciences, La Trobe University; no financial relationships with any organisations  
36 that might have an interest in the submitted work; and no other relationships or activities that  
37 could appear to have influenced the submitted work.

38 Ethical approval: This study was approved by the La Trobe University Human Ethics  
39 Committee (06-078); Human Research Ethics Committee of the Royal Women's Hospital  
40

1  
2  
3 (06/41); Human Research Ethics Committee of the University of Melbourne (1033949); and  
4  
5 Medical Advisory Committee at Frances Perry House.  
6

7 Data sharing: No additional data available.  
8  
9  
10  
11  
12  
13  
14  
15  
16  
17  
18  
19  
20  
21  
22  
23  
24  
25  
26  
27  
28  
29  
30  
31  
32  
33  
34  
35  
36  
37  
38  
39  
40  
41  
42  
43  
44  
45  
46  
47  
48  
49  
50  
51  
52  
53  
54  
55  
56  
57  
58  
59  
60

For peer review only

**Table 1 Characteristics of nulliparous women recruited in late pregnancy**

| <b>Maternal characteristics (n = 346)</b>               | <b>n (%)</b>        |
|---------------------------------------------------------|---------------------|
| Hospital                                                |                     |
| Royal Women's Hospital (public)                         | 154 (44.5)          |
| Frances Perry House (private)                           | 192 (55.5)          |
| Age (years - mean, SD, range)                           | 32.7 (4.1, 19 - 44) |
| Marital status                                          |                     |
| Married                                                 | 229 (66)            |
| Unmarried , living with partner                         | 103 (30)            |
| Not living with partner                                 | 2 (1)               |
| Separated / divorced                                    | 1 (0)               |
| Single                                                  | 11 (3)              |
| Education level                                         |                     |
| Tertiary degree or higher                               | 267 (77)            |
| Other                                                   | 79 (23)             |
| Gestation at recruitment (weeks - mean, SD, range)      | 37 (1.3, 34 - 42)   |
| Gestation at birth (weeks - mean, SD, range)            | 39 (1.2, 36 - 42)   |
| Breastfeeding intention (months - mean, range)          | 9.7 (1 - 24)        |
| Caesarean birth                                         | 156 (45)            |
| Baby sex – male                                         | 168 (49)            |
| Any breast milk feeding at 8 weeks postpartum (n = 340) | 320 (94)            |

**Table 2 Results from microbiological analysis of specimens collected from 346 women and their infants (at any time point)**

|                                                    | <b>Culture positive</b> | <b>PCR positive</b> | <b>Either culture/PCR positive</b> |
|----------------------------------------------------|-------------------------|---------------------|------------------------------------|
| <b>Nipple*</b>                                     |                         |                     |                                    |
| <i>C. albicans</i>                                 | 13                      | 15                  | 19                                 |
| <i>C. glabrata</i>                                 | 1                       | 3                   | 4                                  |
| <i>Candida</i> spp.                                | 9                       | 115                 | 120                                |
| <b>Any <i>Candida</i> spp.</b>                     | <b>21</b>               | <b>116</b>          | <b>125</b>                         |
| <i>S. aureus</i>                                   | 206 (60%)               | N/A                 | N/A                                |
| <b>Breast milk**</b>                               |                         |                     |                                    |
| <i>C. albicans</i>                                 | 9                       | N/A                 | N/A                                |
| <i>C. glabrata</i>                                 | 1                       | N/A                 | N/A                                |
| <i>Candida</i> spp.                                | 10                      | N/A                 | N/A                                |
| <b>Any <i>Candida</i> spp.</b>                     | <b>18</b>               | <b>N/A</b>          | <b>N/A</b>                         |
| <i>S. aureus</i>                                   | 186 (54%)               | N/A                 | N/A                                |
| <b>Infant nose/mouth**</b>                         |                         |                     |                                    |
| <i>C. albicans</i>                                 | 15                      | N/A                 | N/A                                |
| <i>C. glabrata</i>                                 | 0                       | N/A                 | N/A                                |
| <i>Candida</i> spp.                                | 5                       | N/A                 | N/A                                |
| <b>Any <i>Candida</i> spp.</b>                     | <b>18</b>               | <b>N/A</b>          | <b>N/A</b>                         |
| <i>S. aureus</i>                                   | 253 (73%)               | N/A                 | N/A                                |
| Any <i>Candida</i> spp. in nipple/breast milk      | 131 (38%)               |                     |                                    |
| Any <i>Candida</i> spp. in nipple/breast milk/baby | 133 (38%)               |                     |                                    |
| Any <i>S. aureus</i> in nipple/breast milk         | 231 (67%)               |                     |                                    |
| Any <i>S. aureus</i> in nipple/breast milk/baby    | 277 (80%)               |                     |                                    |

\* Nipple swabs collected at late pregnancy, hospital, weeks 1, 2, 3 and 4.

\*\* Breast milk, and infant nasal and oral swabs, collected at hospital, weeks 1, 2, 3 and 4.

N/A = not applicable.

**Table 3– Candida positive on PCR or culture at each visit**

|                                 | <b>Candida PCR positive</b> | <b>Candida PCR negative</b> | <b>Total</b> |
|---------------------------------|-----------------------------|-----------------------------|--------------|
| <b>Candida culture positive</b> | 88                          | 41                          | 129          |
| <b>Candida culture negative</b> | 169                         | 1,817                       | 1,986        |
| <b>Total</b>                    | <b>257</b>                  | <b>1,858</b>                | <b>2,115</b> |



Table 4 Case definition and *Candida* spp. (culture or PCR) and *S. aureus* separately (n = 346)

| Nipple/breast thrush case definition:<br>Burning nipple pain weeks plus breast pain (non-mastitis)<br>Weeks 1- 8                             |                                                                                     |                 |
|----------------------------------------------------------------------------------------------------------------------------------------------|-------------------------------------------------------------------------------------|-----------------|
|                                                                                                                                              | <b><i>Candida</i> spp. in culture/PCR<br/>(nipple/breast milk/baby)<sup>a</sup></b> |                 |
| <b>Nipple/breast thrush case definition</b>                                                                                                  | Yes<br>(n = 127)                                                                    | No<br>(n = 219) |
| Yes (n = 65)                                                                                                                                 | 31 (48%)                                                                            | 34 (21%)        |
| No (n = 281)                                                                                                                                 | 96 (34%)                                                                            | 185 (66%)       |
|                                                                                                                                              | <b><i>S. aureus</i> (nipple/breast<br/>milk/baby)<sup>b</sup></b>                   |                 |
| <b>Nipple/breast thrush case definition</b>                                                                                                  | Yes<br>(n = 274)                                                                    | No<br>(n = 72)  |
| Yes (n = 65)                                                                                                                                 | 52 (80%)                                                                            | 13 (20%)        |
| No (n = 281)                                                                                                                                 | 222 (79%)                                                                           | 59 (21%)        |
| Nipple/breast thrush case definition:<br>Burning nipple pain weeks plus breast pain (non-mastitis)<br>Weeks 2- 8                             |                                                                                     |                 |
|                                                                                                                                              | <b><i>Candida</i> spp. in culture/PCR<br/>(nipple/breast milk/baby)<sup>c</sup></b> |                 |
| <b>Nipple/breast thrush case definition</b>                                                                                                  | Yes<br>(n = 127)                                                                    | No<br>(n = 219) |
| Yes (n = 50)                                                                                                                                 | 26 (52%)                                                                            | 24 (48%)        |
| No (n = 296)                                                                                                                                 | 101 (34%)                                                                           | 195 (66%)       |
|                                                                                                                                              | <b><i>S. aureus</i> (nipple/breast<br/>milk/baby)<sup>d</sup></b>                   |                 |
| <b>Nipple/breast thrush case definition</b>                                                                                                  | Yes<br>(n = 274)                                                                    | No<br>(n = 72)  |
| Yes (n = 50)                                                                                                                                 | 41 (82%)                                                                            | 9 (18%)         |
| No (n = 296)                                                                                                                                 | 233 (79%)                                                                           | 63 (21%)        |
| Nipple/breast thrush case definition:<br>Burning nipple pain weeks plus breast pain (non-mastitis), <i>excluding vasospasm</i><br>Weeks 2- 8 |                                                                                     |                 |
|                                                                                                                                              | <b><i>Candida</i> spp. in culture/PCR<br/>(nipple/breast milk/baby)<sup>e</sup></b> |                 |
| <b>Nipple/breast thrush case definition, excluding vasospasm</b>                                                                             | Yes<br>(n = 127)                                                                    | No<br>(n = 219) |
| Yes (n = 48)                                                                                                                                 | 26 (54%)                                                                            | 22 (46%)        |
| No (n = 298)                                                                                                                                 | 101 (34%)                                                                           | 197 (66%)       |
|                                                                                                                                              | <b><i>S. aureus</i> (nipple/breast<br/>milk/baby)<sup>f</sup></b>                   |                 |
| <b>Nipple/breast thrush case definition, excluding vasospasm</b>                                                                             | Yes<br>(n = 274)                                                                    | No<br>(n = 72)  |
| Yes (n = 48)                                                                                                                                 | 40 (83%)                                                                            | 8 (17%)         |

|                                                              |                 |                 |          |
|--------------------------------------------------------------|-----------------|-----------------|----------|
|                                                              | No (n = 298)    | 234 (79%)       | 64 (21%) |
| <b>Nipple/breast thrush case definition:</b>                 |                 |                 |          |
| Burning nipple pain weeks plus breast pain (non-mastitis)    |                 |                 |          |
| <b>Weeks 1- 8</b>                                            |                 |                 |          |
| <i>Candida</i> spp. in culture only<br>(nipple) <sup>g</sup> |                 |                 |          |
| <b>Nipple/breast thrush case definition</b>                  | Yes<br>(n = 21) | No<br>(n = 325) |          |
| Yes (n = 65)                                                 | 9 (14%)         | 56 (86%)        |          |
| No (n = 281)                                                 | 12 (4%)         | 269 (96%)       |          |

<sup>a</sup>Chi<sup>2</sup>(1) = 4.1587, p = 0.041

<sup>b</sup>Chi<sup>2</sup>(1) = 0.0318, p = 0.858

<sup>c</sup>Chi<sup>2</sup>(1) = 5.8850, p = 0.015

<sup>d</sup>Chi<sup>2</sup>(1) = 0.2799, p = 0.597

<sup>e</sup>Chi<sup>2</sup>(1) = 7.3142, p = 0.007

<sup>f</sup>Chi<sup>2</sup>(1) = 0.5804, p = 0.446

<sup>g</sup>Chi<sup>2</sup>(1) = 8.4905, p = 0.004

**Table 5 Time-to-event analysis of predictors of first symptoms of case definition**

|                                       |     | Events <sup>1</sup> | Years<br>at<br>risk <sup>2</sup> | Rate<br>Ratio<br>(95%CI) | p-<br>value | Multivariate<br>Rate Ratio<br>(95%CI) | p-<br>value |
|---------------------------------------|-----|---------------------|----------------------------------|--------------------------|-------------|---------------------------------------|-------------|
| <b>Candida<br/>(nipple/milk/baby)</b> | No  | 35                  | 18.3                             |                          |             |                                       |             |
|                                       | Yes | 23                  | 6.4                              | 1.87<br>(1.10,<br>3.16)  | 0.018       | 2.03 (1.19,<br>3.45)                  | 0.009       |
| <b>S. aureus<br/>(nipple/milk)</b>    | No  | 19                  | 10.5                             |                          |             |                                       |             |
|                                       | Yes | 39                  | 14.2                             | 1.53<br>(0.88,<br>2.64)  | 0.128       | 1.415 (0.80,<br>2.46)                 | 0.234       |
| <b>Nipple damage</b>                  | No  | 11                  | 8.7                              |                          |             |                                       |             |
|                                       | Yes | 47                  | 16.1                             | 2.3<br>(1.19,<br>4.43)   | 0.012       | 2.39 (1.21,<br>4.70)                  | 0.012       |

<sup>1</sup>Women with case definition in the first 4 weeks postpartum

<sup>2</sup>Total observed time between birth and first symptoms of case definition or 4 weeks postpartum (whichever occurred first)

**Title:****What role does Candida and/or Staphylococcus play a role in nipple and breast pain in lactation? A cohort study in Melbourne, Australia**

Lisa H Amir<sup>1</sup>, Susan M Donath<sup>2</sup>, Suzanne M Garland<sup>2,3</sup>, Sepehr N Tabrizi<sup>2,3</sup>, Catherine M Bennett<sup>4</sup>, Meabh Cullinane<sup>1</sup>, Matthew S Payne<sup>1,5</sup>

<sup>1</sup>Mother & Child Health Research, La Trobe University, Melbourne, VIC, Australia

<sup>2</sup>Murdoch Childrens Research Institute, Melbourne, VIC, Australia

<sup>3</sup>Department of Molecular Microbiology, Microbiology and Infectious Diseases, Royal Women's Hospital and Department of Obstetrics and Gynaecology, University of Melbourne, VIC, Australia

<sup>4</sup>Deakin Population Health, Deakin University, Burwood, VIC, Australia

<sup>5</sup>School of Women's and Infants' Health, University of Western Australia, WA, Australia

**Abstract**

**Objective:** To investigate ~~the roles of~~ *Candida* species and *Staphylococcus aureus* ~~and in~~ the development of "nipple and breast thrush" among breastfeeding women.

**Design:** Prospective longitudinal cohort study.

**Setting:** Two hospitals in Melbourne, Australia (one public, one private) with follow-up in the community.

**Participants:** 360 nulliparous women recruited at  $\geq 36$  weeks gestation from November 2009 to June 2011. Participants were followed-up six times: in hospital, at home weekly until four weeks postpartum and by telephone at eight weeks.

**Main outcome measures:** ~~A researcher defined proxy diagnosis of~~ Case definition "nipple and breast thrush": burning nipple pain and breast pain (not related to mastitis); detection of

31 January 2013 ~~4-5 November 2012~~

1

*Candida* spp. (using culture and PCR) from the mother's vagina, nipple or breast milk or baby's mouth; detection of *S. aureus* from the mother's nipple or breast milk.

**Results:** Women with the case definition of nipple/breast thrush were more likely to have *Candida* spp. in nipple/breast milk/baby oral samples (54%) compared to other women (36%,  $p = 0.014$ ). *S. aureus* was common in nipple/breast milk/baby samples of women with these symptoms as well as women without these symptoms (82% vs 79%) ( $p = 0.597$ ). Time-to-event analysis examined predictors of nipple/breast thrush up to and including the time of data collection. Candida in nipple/breast milk/baby predicted incidence of the case definition (Rate Ratio 1.87 (95% CI: 1.10, 3.16,  $p = 0.018$ )). The crude Relative Risk of *Candida* spp. in nipple/breast milk/baby was 1.87 (95% CI: 1.10, 3.16,  $p = 0.018$ ); the multivariate RR (adjusted for *S. aureus* in nipple/breast milk and nipple damage) was almost unchanged at 2.03 (95% CI: 1.19, 3.45,  $p = 0.009$ ). We don't have evidence that *S. aureus* colonisation was not a predictor of these symptoms (RR 1.53, 95% CI: 0.88, 2.64,  $p = 0.13$ ), with little change in the multivariate model. Nipple damage was also a **strong** predictor of these symptoms, RR 2.30 (95% CI: 1.19, 4.43,  $p = 0.012$ ), with little change in multivariate model, indicating that *Candida* spp., *S. aureus* and nipple damage are operating independently. In the multivariate model, with all three predictors, the Rate Ratios were very similar to the univariate Rate Ratios. This indicates that *Candida* and nipple damage are independent predictors of our case definition.

## Background

Controversy about the condition known as "breast thrush" or breast candidiasis in lactating women has led to confusion among clinicians and the community. While some clinicians may diagnose and treat this condition in breastfeeding women with deep, radiating breast pain

31 [January 2013](#) ~~4-5 November 2012~~

2

1  
2  
3  
4  
5  
6 associated with burning nipple pain,<sup>1-6</sup> others doubt the relationship with fungal organisms<sup>7-11</sup>  
7  
8 and decry “the alarming trend towards believing that fungi are important in the aetiology of  
9  
10 breast infection and deep breast pain associated with breast feeding, despite a lack of good  
11  
12 quality evidence”.<sup>11</sup> p. 485. ~~Health professionals may tell women that the pain is “all in their~~  
13  
14 ~~head”, which is reminiscent of the lack of understanding of mastalgia in the 1970s, when~~  
15  
16 ~~breast pain was thought to be a psychosomatic complaint by “neurotic” women.~~<sup>12</sup>  
17  
18  
19

20 Unlike mastitis which is diagnosed when a breastfeeding woman experiences inflammation  
21  
22 of the breast associated with systemic symptoms,<sup>12</sup> breast thrush is usually diagnosed when  
23  
24 the breast is not erythematous or indurated, and the woman is afebrile and systemically well  
25  
26 apart from a typical burning pain radiating into the breast and/or into the back.<sup>4</sup> While some  
27  
28 authors use the term ‘candida mastitis’,<sup>6 11 13</sup> we feel this is misleading, as inflammation of  
29  
30 the breast is not evident. Although some clinicians attribute the pain to infection with  
31  
32 ~~*Staphylococcus aureus* (*S. aureus*)~~ and treat women with long-term antibiotics,<sup>14</sup> this has  
33  
34 not been tested in trials.  
35  
36

37 The primary cause of the nipple pain or damage is often the process of breastfeeding itself:  
38  
39 trauma from the infant’s mouth due to incorrect attachment, or infant anatomy or  
40  
41 dysfunctional suck.<sup>15</sup> Nipple thrush is usually diagnosed when the nipple/areola is slightly  
42  
43 pink, sensitive to touch, and the pain described is out of proportion to the damage seen on  
44  
45 clinical examination.<sup>4</sup> When the areola is described as itchy and appears red and/or crusty, the  
46  
47 diagnosis is dermatitis/eczema rather than fungal infection.<sup>16</sup> A nipple with obvious damage  
48  
49 is almost certainly colonised with *S. aureus*.<sup>17</sup> Nipple/breast pain associated with nipple  
50  
51 blanching persisting for longer than a few seconds is likely to be nipple vasospasm; this  
52  
53 condition is commonly confused with breast thrush because of the burning, radiating nature  
54  
55  
56

57 | 31 ~~January 2013~~ 45 ~~November 2012~~  
58  
59  
60

1  
2  
3  
4  
5  
6 of the pain.<sup>18 19</sup> The pain from vasospasm is often secondary to nipple damage or infection,  
7  
8 exacerbated by cold, and relieved by heat or nifedipine.<sup>20</sup> In practice, more than one cause of  
9  
10 nipple or breast pain is commonly present,<sup>6</sup> which makes it difficult to construct a [case](#)  
11  
12 [definitionn algorithm](#) for “breast thrush” for research purposes.  
13

14  
15  
16 Previous breastfeeding studies have been largely cross-sectional,<sup>1 7 9 10</sup> whilst one longitudinal  
17  
18 study collected microbiological data, but no clinical information.<sup>21</sup> This is the first  
19  
20 prospective longitudinal study [examiningof the role of](#) both *S. aureus* and *Candida* spp. in  
21  
22 breast infections and was designed to resolve the current controversy surrounding which is  
23  
24 the primary organism responsible for the condition known as “breast thrush”: *Candida* spp. or  
25  
26 *S. aureus*?  
27  
28  
29

## 30 Methods

31  
32 The CASTLE (Candida and Staphylococcus Transmission: Longitudinal Evaluation) study  
33  
34 was a prospective longitudinal descriptive study; [designed to investigate the role of](#)  
35  
36 [staphylococci and/or candida in nipple and breast pain, and the relationship between](#)  
37  
38 [breastfeeding, postpartum health problems and maternal psychological well being. D](#) details  
39  
40 have been published in the study protocol.<sup>22</sup> A cohort of 360 nulliparous women planning to  
41  
42 breastfeed for at least two months were recruited at  $\geq 36$  weeks gestation from two hospitals  
43  
44 in Melbourne, Australia (November 2009 to June 2011). At recruitment, nasal, nipple (both  
45  
46 breasts) and vaginal swabs were collected and participants completed a questionnaire asking  
47  
48 about previous staphylococcal and candida infections. Following birth, participants were  
49  
50 followed-up six times: face-to-face in hospital, then weekly at home until four weeks  
51  
52 postpartum. Participants filled out a questionnaire at each time point to collect information  
53  
54 about breastfeeding problems and postpartum health problems. At each visit, maternal nasal,  
55

56  
57 | 31 [January 2013](#) 45 [November 2012](#)  
58  
59  
60

1  
2  
3  
4  
5  
6  
7 and nipple swabs and breast milk samples (both breasts) and infant oral and nasal swabs were  
8 collected. At a final telephone interview at eight weeks postpartum information about  
9 breastfeeding problems and postpartum health was collected.  
10

11  
12  
13  
14 Specimens were collected by research assistants. Fresh gloves were worn for each specimen.

15  
16 After sanitising their hands, research assistants collected nipple swabs then washed the

17  
18 nipple/areola region twice using sterile water wipes. Mid-stream milk was collected into a

19  
20 sterile container; the first drops of breast milk were expressed and discarded. Briefly, two

21  
22 nipple swabs were obtained from each nipple; a standard charcoal swab for microbiological  
23 analysis (Copan Diagnostics Inc. CA, USA) and a flocculated swab for molecular analysis

24  
25 (Copan Diagnostics Inc. CA, USA). After first moistening in sterile saline, both the standard

26  
27 and flocculated nipple swabs were rolled over the nipple and areola together using a 10-point

28  
29 swabbing technique,<sup>23</sup> paying particular attention to any cracks / fissures present. Oral and

30  
31 vaginal swabs were collected for culture of *S. aureus* and *Candida* spp. Breast milk samples

32  
33 were also cultured for *S. aureus*, coagulase-negative staphylococci (CoNS) and *Candida* spp;

34  
35 nasal swabs were collected for culture of *S. aureus* only.  
36

37  
38  
39 In studies conducted in women with vulvovaginal symptoms, molecular microbiological

40  
41 techniques have been useful in detecting *Candida* in women who were negative using

42  
43 standard microbiology.<sup>24 25</sup> Therefore we planned to use molecular techniques to increase

44  
45 detection of *Candida* spp. in nipple specimens.<sup>22</sup> Due to cost constraints we did not plan to

46  
47 use molecular techniques for the milk specimens (up to 4000 specimens). As participants

48  
49 only had one or two vaginal specimens we extracted DNA ~~was extracted~~ from vaginal as

50  
51 well as nipple and vaginal swabs for molecular identification of *Candida* spp. using real-time

52  
53 PCR.<sup>22</sup>  
54

55  
56  
57 | 31 January 2013-5 November 2012  
58  
59  
60

1  
2  
3  
4  
5  
6  
7  
8  
9 At each contact, women were asked about nipple pain ([“In the last 48 hours, have you been](#)  
10 [experiencing nipple pain/discomfort?](#)) and whether it was burning in quality ([“If yes, would](#)  
11 [you describe your nipple pain as burning?”](#)), clinical signs and symptoms of mastitis as used  
12 in previous research (i.e. redness, fever, etc.),<sup>26</sup> and other types of breast pain ([“Have you had](#)  
13 [other breast pain in the last 2 days? No/ I have had stabbing \(radiating or shooting\) breast](#)  
14 [pain only/ I have had non-stabbing breast pain only/ I have had both stabbing and non-](#)  
15 [stabbing breast pain”](#)), such as radiating (“stabbing”) or non-stabbing. We also asked “Do  
16 [you have nipple vasospasm? \(Nipple blanches or goes white in the cold or during/after feeds\)](#)  
17 [No/ Yes, for less than 5 minutes/ Yes, for more than 5 minutes/ Not sure”](#)). Researchers also  
18 collected clinical observations of nipple/areola and breast at each visit (weeks 1 to 4),  
19 including colour of nipple/areola. ~~Our case definition of~~[We defined "nipple and breast](#)  
20 [thrush" used as a combination of burning nipple pain and breast pain \(non-mastitis\). Francis-](#)  
21 [Morrill et al found nipple appearance \("shiny" or flaky" nipple\) or pink colour\) to be](#)  
22 [predictive of Candida.](#)<sup>27</sup> However, [in our study](#) very few women were described as having  
23 these appearances (shiny, n = 4, flaky, n = 17), while 140 women were described as having  
24 “pink” nipple/s. ~~Adding-making~~ the appearance identifiers ~~unlikely to be helpful into our case~~  
25 ~~definition was not helpful.~~ ~~the algorithm.~~ ~~Therefore we used a combination of burning nipple~~  
26 ~~pain and breast pain (non mastitis) as a proxy for a clinical diagnosis of "nipple and breast~~  
27 ~~thrush".~~ ~~Clinically, the symptoms of nipple and breast thrush develop after the first week~~  
28 ~~postpartum, and since most pain in the first week postpartum in first time mothers is likely to~~  
29 ~~be due to adjusting to breastfeeding, we examined the case definition at weeks 1 to 8, and~~  
30 ~~weeks 2 to 8 separately.~~

31 [January 2013](#)–[November 2012](#)



1  
2  
3  
4  
5  
6  
7 Statistical analysis was conducted using Stata Version 12. Hypothesis 1 — Women with  
8 nipple/breast thrush are more likely to have *Candida* spp. isolated than other women;  
9 hypothesis 2 — Women with nipple/breast thrush are more likely to have *S. aureus* isolated  
10 than other women. A sample of 318 women was estimated to provide adequate power.<sup>22</sup> Chi-  
11 squared tests were used for comparing categorical variables. We investigated incidence of  
12 nipple/breast thrush using a multivariable discrete version of the proportional hazards  
13 regression model.<sup>28</sup> Outcome variable was the incidence of new cases of our [nipple and](#)  
14 breast thrush [definition](#)[diagnosis](#); time-varying predictors were: the presence of *Candida* spp.,  
15 presence of *S. aureus* and mother-reported nipple damage. We present crude [Rate](#)[relative](#)  
16 [Ratios](#)[isks](#) (RR), and multivariate analysis, adjusting for the presence of *Candida* spp, *S.*  
17 *aureus* and nipple damage.  
18  
19  
20  
21  
22  
23  
24  
25  
26  
27  
28  
29

30 Results relating to mastitis, other breastfeeding and postpartum problems will be published  
31 separately (papers in preparation).  
32  
33  
34  
35

## 36 Results

37  
38 Fourteen women withdrew from the study after giving birth, leaving 346 (96%) women  
39 available for data collection at subsequent visits; 340 (94%) women completed the study at 8  
40 weeks postpartum. Women who participated in the study were highly educated (77% had  
41 tertiary degree or higher) and most were married or lived with their partner (96%) (Table 1).  
42  
43 Just over half gave birth in the private hospital (56%), 45% by Caesarean section.  
44  
45  
46  
47  
48

49 Burning nipple pain was reported by 42% of women (146/346) during weeks 1 to 8, or 32%  
50 women (111/346) during weeks 2 to 8. Radiating or non-radiating breast pain (not related to  
51 engorgement/mastitis) was reported by 54% of women (186/346) during weeks 1 to 8, or  
52  
53  
54  
55

56  
57 | 31 [January 2013](#)–[November 2012](#)  
58  
59  
60

7

1  
2  
3  
4  
5  
6  
7 47% of women (162/346) during weeks 2 to 8. Combining these symptoms to estimate the  
8 proportion of women with both burning nipple pain and non-mastitis breast pain (at the same  
9 time): 19% of women in weeks 1 to 8 (65/346), or 15% in weeks 2 to 8 (50/346).  
10  
11

12  
13  
14 *Candida albicans* was the most commonly isolated *Candida* spp in culture with *Candida*  
15 *glabrata* only isolated in one nipple specimen and one milk sample (Table 2). Although  
16 "other *Candida* spp." were found, none speciated as *Candida krusei* or *Candida kefyr*.  
17  
18 *Candida* PCR of the nipple was positive for *Candida* spp. in 33% of women (115/346); in  
19 contrast to culture of only 3% of women (9/346) being positive for *Candida* spp.. *Candida*  
20 spp. were isolated by culture from breast milk samples from 5% women (18/346), but no  
21 molecular analyses were conducted on these samples. [Table 3 shows Candida isolated by](#)  
22 [culture and by PCR at each visit.](#) *S. aureus* was isolated by culture from the nipple and/or  
23 breast milk in 67% of women (231/346), and from nose and/or mouth of 73% of infants  
24 (253/346) [at some point during follow-up.](#) [There were 22 milk samples positive for Candida,](#)  
25 [of which 10 were milk only, and 12 were positive for nipple and milk.](#) [For \*S. aureus\*, 425](#)  
26 [milk samples were positive, of which 89 were positive in milk only.](#)  
27  
28  
29  
30  
31  
32  
33  
34  
35  
36  
37  
38

39 ~~As burning nipple pain was very common in week 1, primarily as women adjusted to~~  
40 ~~breastfeeding were included, therefore we explored the relationship between *Candida* spp.~~  
41 ~~and *S. aureus* using two case definitions: weeks 1-8 and weeks 2-8 (Table 34). we developed~~  
42 ~~a proxy diagnosis for nipple/breast thrush if women had burning nipple pain as well as breast~~  
43 ~~pain (non-mastitis) between weeks 2 and 8.~~ There was a statistically significant association  
44 between these symptoms- [in weeks 2-8](#) and *Candida* spp. in nipple/breast milk/baby (p =  
45 0.014, [see Table 3](#)); as also for *Candida* spp. in vagina/nipple/breast milk/baby (p = 0.047,  
46 not shown). ~~There was evidence that *S. aureus* was common~~ in nipple/breast milk/[baby](#)  
47  
48  
49  
50  
51  
52  
53  
54

55  
56  
57 31 [January 2013-5 November 2012](#)  
58  
59  
60

1  
2  
3  
4  
5  
6  
7 samples ~~of was higher in w~~women with these symptoms ~~as well as than other~~women ~~without~~  
8 ~~these symptoms~~ (8278% vs 7965%) (p = ~~0.5970-068~~, Table ~~34~~).

9  
10  
11  
12 ~~As women with nipple vasospasm describe a burning, radiating pain, we also analysed the~~  
13 ~~case definition excluding women with vasospasm (see Table 4). Only two women were~~  
14 ~~removed from the analysis (n= 48), which made little difference to the results.~~

15  
16  
17  
18  
19  
20 Time-to-event analysis examined predictors of ~~our case definition of nipple/breast thrush~~  
21 ~~(burning nipple and breast pain [(non-mastitis)])~~ up to and including the time of data  
22 collection ~~in the first four weeks~~. (See unadjusted survival curves: Figures 1, 2 and 3 ~~and~~  
23 ~~Table 5~~). ~~Candida in nipple/breast milk/baby predicted incidence of the case definition (The~~  
24 ~~erude Rate~~relative Ratio~~of candida in nipple/breast milk/baby was~~ 1.87 (95% CI: 1.10,  
25 3.16, p = 0.018). ~~Thus, for women with Candida in nipple/milk/baby at any time point, the~~  
26 ~~rate of subsequently developing the case definition was increased by 87%, compared to~~  
27 ~~women without Candida; the multivariate RR (adjusted for *S. aureus* in nipple/breast milk~~  
28 ~~and nipple damage) was almost unchanged at 2.03 (95% CI: 1.19, 3.45, p = 0.009). The~~  
29 ~~evidence for *S. aureus* colonisation~~ ~~as was not~~ a predictor of these symptoms ~~was not strong~~  
30 (RR 1.53, 95% CI: 0.88, 2.64, p = 0.13), ~~with little change in the multivariate model.~~

31  
32  
33  
34  
35  
36  
37  
38  
39  
40  
41 Mothers' report of nipple damage was ~~also a strong~~ predictor of these symptoms, with a RR  
42 2.30 (95% CI: 1.19, 4.43, p = 0.012), ~~with little change in the multivariate model, which In~~  
43 ~~the multivariate model, with all three predictors, the Rate Ratios were very similar to the~~  
44 ~~univariate Rate Ratios. This~~ indicates that ~~C~~candida, ~~*S. aureus*~~ and nipple damage are  
45 ~~operating~~ independently ~~by~~ ~~predictors of our case definition~~.

## 51 52 53 Discussion

54  
55  
56  
57 | 31 ~~January 2013~~45 November 2012

## Principal findings

Unlike some cross-sectional studies which found no relationship between the presence of *Candida* spp. and the condition known as breast thrush,<sup>9 10</sup> we have shown that *Candida* spp. is associated with burning nipple pain and breast pain – in two analyses ('at any time' and 'time-to-event'). As in previous studies,<sup>17</sup> we uncommonly isolated *Candida* spp. on the nipple using standard microbiological culture techniques. However, *Candida* spp. were more commonly identified using more sensitive molecular techniques (real-time PCR). This test is not used in routine practice currently, and therefore it is not helpful in making the diagnosis in clinical care at this time. *Candida* spp. were also rarely isolated in breast milk using standard techniques. It is possible that the isolation rate would have been higher if we had used the technique of Morrill and colleagues, who added iron to inactivate milk lactoferrin.<sup>29</sup> However, Hale et al were unable to identify *Candida* in breast milk of women with 'Candida mastitis' using culture and another specific technique (presence of 1→3-β-D-glucan).<sup>10</sup> The 16 cases had 'sore, inflamed, or traumatized nipples, intense stabbing or burning pain that radiated into the axilla often persisting after feeding, and painful feeding without alternate diagnosis'.<sup>10</sup> Possible explanations for Hale et al's findings are that the women had other causes of their pain (from the traumatised nipple, from maternal vasospasm, or infant posterior tongue-tie or other mechanical causes of pain); that *Candida* was present in the nipple (samples were only collected from the milk), or that *Candida* is not present in the milk of women with this syndrome. The question as to whether *Candida* is present in the lactiferous ducts is still open to debate; what we have shown is a link between *Candida* and nipple/breast pain – independent of the presence of nipple damage or *S. aureus*. *Candida* spp. are commensal organisms, and therefore the presence of *Candida* spp. does not always imply infection. Recent understanding of vulvovaginitis postulates that the threshold

1  
2  
3  
4  
5  
6  
7 [number of organisms for symptomatic vaginitis varies for different groups of women; women](#)  
8 [with infrequent vaginitis have a higher threshold.](#)<sup>30</sup> [Furthermore, the symptoms associated](#)  
9 [with vaginitis may be caused by the host neutrophil response; small numbers of organisms](#)  
10 [may promote an aggressive inflammatory response in some women.](#)<sup>30</sup>

11  
12  
13  
14  
15  
16 ~~Diagnostic skills are needed to make the diagnosis of nipple/breast candidiasis; clinicians~~  
17 ~~should routinely consider all causes of nipple and breast pain, in the same way they consider~~  
18 ~~differential diagnoses when assessing a patient with chest pain.~~<sup>28</sup>

Field Code Changed

19  
20  
21  
22  
23  
24 Consistent with other studies of mothers and infants,<sup>21 31-34</sup> colonisation with *S. aureus* is  
25 common; at least 50% of women were colonised with *S. aureus* in nipple or milk samples by  
26 four weeks postpartum. Therefore in clinical practice, a finding of *S. aureus* on the nipple or  
27 breast milk is not evidence that the bacteria are the principal cause of the woman's pain. Our  
28 analysis indicates that candida and *S. aureus* are acting independently, despite often co-  
29 existing. The case-control study of women with a clinical diagnosis of nipple and breast  
30 thrush by Panjaitan and colleagues which only used molecular techniques from nipple swabs  
31 and excluded women with clinical signs of bacterial infection (exudate on nipple or inflamed  
32 breast), found that *S. aureus* was present in equal numbers of cases and controls.<sup>35</sup>

### 33 **Clinical implications**

34  
35  
36  
37  
38  
39  
40  
41  
42  
43  
44  
45 [Diagnostic skills are needed to make the diagnosis of nipple/breast candidiasis; clinicians](#)  
46 [should routinely consider all causes of nipple and breast pain, in the same way they consider](#)  
47 [differential diagnoses when assessing a patient with chest pain.](#)<sup>36</sup> [Women with nipple damage](#)  
48 [or with nipple vasospasm describe pain that is burning in quality; in the past this has often](#)  
49 [been misdiagnosed as Candida infection.](#)<sup>37</sup> [The pain clinically associated with Candida](#)  
50  
51  
52  
53  
54

Field Code Changed

55  
56  
57 | 31 [January 2013](#)–[November 2012](#)

11

1  
2  
3  
4  
5  
6  
7 [infection is persistent, ranges from mild to severe, and is not relieved by the use of nipple](#)  
8 [shields or expressing/pumping, or applying heat. When the pain is related directly to infant](#)  
9 [feeding the cause is likely to be mechanical, and when the pain is relieved by heat, vasospasm](#)  
10 [is the likely cause.](#)<sup>19</sup> [We found that nipple damage was associated with burning nipple and](#)  
11 [radiating breast pain, so clinicians should be cautious about diagnosing infection \(whether](#)  
12 [fungal or bacterial\) in every woman with nipple damage.](#)

### 19 20 **Strengths and limitations**

21  
22 The strength of this study is that a cohort of healthy women who had not previously breastfed  
23 was recruited prior to commencing breastfeeding and was followed closely until two months  
24 postpartum. [It is the first prospective longitudinal study to examine simultaneously both \*S.\*](#)  
25 [aureus and \*Candida\* spp. in a cohort of breastfeeding women and their infants.](#)

26  
27  
28  
29  
30  
31 The main limitation is that we did not have a clinical diagnosis of nipple/breast thrush and  
32 had to use a [case definition based on two symptoms](#)~~proxy diagnosis~~ to estimate this  
33 condition. [Participants responded to questions about pain and nipple blanching, and research](#)  
34 [assistants reported nipple appearance, but these measures could not substitute for a clinical](#)  
35 [assessment. Furthermore infant oral anatomy was not examined to exclude tongue-tie, and](#)  
36 [breastfeeds were not observed. We are not implying that all women with burning nipple and](#)  
37 [breast pain had a clinical diagnosis of nipple/breast thrush. We hypothesise that \*Candida\* is](#)  
38 [associated with nipple/breast pain in some women, in a similar manner to the relationship](#)  
39 [between \*Candida\* and vulvovaginal symptoms: \*Candida\* is a commensal in some women,](#)  
40 [while other women experience significant pain when only small numbers of organisms are](#)  
41 [present.](#)<sup>30</sup>

42  
43  
44  
45  
46  
47  
48  
49  
50  
51  
52  
53  
54  
55  
56  
57 | 31 [January 2013](#)–[November 2012](#)

Another limitation is that we only followed the cohort for eight weeks postpartum – with microbiological data to only four weeks postpartum; women who developed problems after this time period were not captured in our data collection.

## Conclusions

This large cohort study provides evidence on firms that *Candida* spp. play a role in nipple and breast pain in lactating women, and “thrush in the breast” should not be dismissed as “psychosomatic” as has been stated by some clinicians. B, however, burning nipple pain is common in breastfeeding women, and a diagnosis of *Candida* spp. infection should not be made without considering differential diagnoses.<sup>4</sup> Further research into the role of staphylococci in breast pain in lactating women with inflammatory symptoms and without is needed. Animal models, as have been used in vulvovaginal candidiasis,<sup>30</sup> may be required -to fully understand the pathogenesis of this condition. Future researchers may consider the use of animal models RCTs for treatment or clearance of *Candida*.

## References

1. Amir LH, Garland SM, Dennerstein L, Farish SJ. *Candida albicans*: is it associated with nipple pain in lactating women? *Gynecol Obstet Invest* 1996;41(1):30-34.
2. Montgomery AM. Breastfeeding and postpartum maternal care. *Prim Care* 2000;27(1):237-50.
3. Brent NB. Thrush in the breastfeeding dyad: results of a survey on diagnosis and treatment. *Clin Pediatr (Phila)* 2001;40(9):503-06.
4. Moorhead AM, Amir LH, O'Brien PW, Wong S. A prospective study of fluconazole treatment for breast and nipple thrush. *Breastfeed Rev* 2011;19(3):25-29.
5. Hoddinott P, Tappin D, Wright C. Breast feeding. *BMJ* 2008;336(7649):881-87.
6. Heller MM, Fullerton-Stone H, Murase JE. Caring for new mothers: diagnosis, management and treatment of nipple dermatitis in breastfeeding mothers. *Int J Dermatol* 2012;51(10):1149-61.
7. Thomassen P, Johansson VA, Wassberg C, Petrini B. Breast-feeding, pain and infection. *Gynecol Obstet Invest* 1998;46(2):73-74.

31 [January 2013](#) ~~45 November 2012~~

8. Carmichael AR, Dixon JM. Is lactation mastitis and shooting breast pain experienced by women during lactation caused by *Candida albicans*? *Breast* 2002;11:88-90.
9. Graves S, Wright W, Harman R, Bailey S. Painful nipples in nursing mothers: Fungal or staphylococcal? A preliminary study. *Aust Fam Physician* 2003;32(7):570-71.
10. Hale TW, Bateman TL, Finkelman MA, Berens PD. The absence of *Candida albicans* in milk samples of women with clinical symptoms of ductal candidiasis. *Breastfeed Med* 2009;4(2):57-61.
11. Dixon JM, Khan LR. Treatment of breast infection. *BMJ* 2011;342:484-89.
12. Amir LH, The Academy of Breastfeeding Medicine Protocol Committee. ABM Clinical Protocol # 4: Mastitis, Revision, May 2008. *Breastfeed Med* 2008;3(3):177-80.
13. Hanna L, Cruz SA. *Candida* mastitis: a case report. *Perm J* 2011;15(1):62-64.
14. Eglash A, Plane MB, Mundt M. History, physical and laboratory findings, and clinical outcomes of lactating women treated with antibiotics for chronic breast and/or nipple pain. *J Hum Lact* 2006;22(4):429-33.
15. Watson Genna C. The influence of anatomical and structural issues on sucking skills. In: Watson Genna C, editor. *Supporting Sucking Skills in Breastfeeding Infants*. Sudbury, Massachusetts: Jones and Bartlett Publishers, 2008:181-226.
16. Barankin B, Gross MS. Nipple and areolar eczema in the breastfeeding woman. *J Cutan Med Surg* 2004;8(2):126-30.
17. Livingstone V, Stringer LJ. The treatment of *Staphylococcus aureus* infected sore nipples: A randomized comparative study. *J Hum Lact* 1999;15(3):241-46.
18. Page SM, McKenna DS. Vasospasm of the nipple presenting as painful lactation. *Obstet Gynec* 2006;108(3):806-08.
19. Amir LH. Breast pain in lactating women - mastitis or something else? *Aust Fam Physician* 2003;32(3):141-45.
20. Anderson JE, Held N, Wright K. Raynaud's phenomenon of the nipple: a treatable cause of painful breastfeeding. *Pediatrics* 2004;113(4):e360-4.
21. Peacock SJ, Justice A, Griffiths D, de Silva GD, Kantzanou MN, Crook D, et al. Determinants of acquisition and carriage of *Staphylococcus aureus* in infancy. *J Clin Microbiol* 2003;41(12):5718-25.
22. Amir LH, Cullinane M, Garland SM, Tabrizi SN, Donath SM, Bennett CM, et al. The role of micro-organisms (*Staphylococcus aureus* and *Candida albicans*) in the pathogenesis of breast pain and infection in lactating women: study protocol. *BMC Pregnancy Childbirth* 2011;11:54.
23. Stuebe A. Lactation culture protocol [http://www.mombaby.org/PDF/culture\\_protocol.2.0.pdf](http://www.mombaby.org/PDF/culture_protocol.2.0.pdf), 2011.
24. Weissenbacher T, Witkin SS, Ledger WJ, Tolbert V, Gingelmaier A, Scholz C, et al. Relationship between clinical diagnosis of recurrent vulvovaginal candidiasis and detection of *Candida* species by culture and polymerase chain reaction. *Arch Gynecol Obstet* 2009;279(2):125-29.
25. Tabrizi SN, Pirota MV, Rudland E, Garland SM. Detection of *Candida* species by PCR in self-collected vaginal swabs of women after taking antibiotics (Letter). *Mycoses* 2006;49:523-24.
26. Amir LH, Forster DA, Lumley J, McLachlan H. A descriptive study of mastitis in Australian breastfeeding women: incidence and determinants. *BMC Public Health* 2007;7:62.
27. Francis-Morrill J, Heinig MJ, Pappagianis D, Dewey KG. Diagnostic value of signs and symptoms of mammary candidosis among lactating women. *J Hum Lact* 2004;20(3):288-95.



- 1  
2  
3  
4  
5  
6  
7 28. Carlin JB, Wolfe R, Coffey C, Patton GC. Analysis of binary outcomes in longitudinal  
8 studies using weighted estimating equations and discrete-time survival methods:  
9 prevalence and incidence of smoking in an adolescent cohort. *Statistics in medicine*  
10 1999;18(19):2655-79.  
11 29. Morrill JF, Pappagianis D, Heinig MJ, Lonnerdal B, Dewey KG. Detecting *Candida*  
12 *albicans* in human milk. *J Clin Microbiol* 2003;41(1):475-78.  
13 30. Fidel PLJ. History and update on host defense against vaginal candidiasis. *Am J Reprod*  
14 *Immunol* 2007;57(1):2-12.  
15 31. Amir LH, Garland SM, Lumley J. A case-control study of mastitis: nasal carriage of  
16 *Staphylococcus aureus*. *BMC Fam Pract* 2006;7:57.  
17 32. Kawada M, Okuzumi K, Hitomi S, Sugishita C. Transmission of *Staphylococcus aureus*  
18 between healthy, lactating mothers and their infants by breastfeeding. *J Hum Lact*  
19 2003;19(4):411-17.  
20 33. Jimenez-Truque N, Tedeschi S, Saye EJ, McKenna BD, Langdon W, Wright JP, et al.  
21 Relationship between maternal and neonatal *Staphylococcus aureus* colonization.  
22 *Pediatrics* 2012;129(5):e1252-9.  
23 34. Leshem E, Maayan-Metzger A, Rahav G, Dolitzki M, Kuint J, Roytman Y, et al.  
24 Transmission of *Staphylococcus aureus* from mothers to newborns. *Pediatr Infect Dis*  
25 *J* 2012;31(4):360-3.  
26 35. Panjaitan M, Amir LH, Costa A-M, Rudland E, Tabrizi SN. Polymerase chain reaction in  
27 detection of *Candida albicans* for confirmation of clinical diagnosis of nipple thrush  
28 (Letter). *Breastfeed Med* 2008;3(3):185-87.  
29 36. Yelland M, Cayley WE, Jr., Vach W. An algorithm for the diagnosis and management of  
30 chest pain in primary care. *Med Clin North Am* 2010;94(2):349-74.  
31 37. Morino C, Winn SM. Raynaud's phenomenon of the nipples: an elusive diagnosis. *J Hum*  
32 *Lact* 2007;23(2):191-93.  
33

34  
35 Contributors: LHA conceived the study, which was designed in collaboration with all  
36 authors. SMD managed the data and conducted the statistical analyses. SMG, SNT, CMB and  
37 MSP provided microbiological expertise. MC was the project co-ordinator. MSP was the  
38 research scientist.  
39

40  
41  
42 Competing interests: All authors have completed the ICMJE uniform disclosure form at  
43 [www.icjme.org/coi\\_disclosure.pdf](http://www.icjme.org/coi_disclosure.pdf) (available on request from the corresponding author) and  
44 declare that: this stud received financial support from the National Health & Medical  
45 Research Council (NHMRC) (project grant [502053541907](http://www.nhmrc.gov.au/grants/502053541907), equipment grant, Health  
46 Professional Training Fellowship (LHA)), Helen Mcpherson Smith Trust, Faculty Research  
47 Grant, Faculty of Health Sciences, La Trobe University; no financial relationships with any  
48  
49  
50  
51  
52  
53  
54  
55  
56

57 | 31 [January 2013](#)–[November 2012](#)  
58  
59  
60

1  
2  
3  
4  
5  
6  
7 organisations that might have an interest in the submitted work; and no other relationships or  
8 activities that could appear to have influenced the submitted work.

9  
10 Ethical approval: This study was approved by the La Trobe University Human Ethics  
11 Committee (06-078); Human Research Ethics Committee of the Royal Women's Hospital  
12 (06/41); Human Research Ethics Committee of the University of Melbourne (1033949); and  
13  
14 (06/41); Human Research Ethics Committee of the University of Melbourne (1033949); and  
15  
16 Medical Advisory Committee at Frances Perry House.

17  
18 Data sharing: No additional data available.  
19

## 20 21 22 **Article summary** 23

### 24 **Article Focus**

- 25  
26 • Controversy about the condition known as "breast thrush" or breast candidiasis in  
27 lactating women has led to confusion among clinicians and the community.
- 28  
29 • Previous studies have been cross-sectional.
- 30  
31 • This is the first prospective longitudinal study [to examine simultaneously both of the role](#)  
32  
33 [of both](#) *S. aureus* and *Candida* spp. in breast infections and was designed to resolve the  
34  
35 current controversy surrounding which is the primary organism responsible for the  
36  
37 condition known as "breast thrush": *Candida* spp. or *S. aureus*?  
38  
39

### 40 41 42 **Key Messages**

- 43  
44 • *Candida* spp. is associated with burning nipple pain and breast pain.
- 45  
46 • Colonisation with *S. aureus* is common; at least 50% of women were colonised with *S.*  
47  
48 *aureus* in nipple or milk samples by four weeks postpartum.  
49

### 50 51 52 **Strengths and Limitations** 53

54  
55  
56  
57 | 31 [January 2013](#) ~~45 November 2012~~  
58  
59  
60

- 1  
2  
3  
4  
5  
6  
7 • The evidence of microbiological data from this large cohort of women over four weeks  
8 postpartum is stronger than previous smaller cross-sectional studies.  
9  
10 • *Candida* spp. were more commonly identified using more sensitive molecular techniques  
11 (real-time PCR) than by using standard microbiological culture techniques.  
12  
13  
14 • As these techniques are not used in clinical practice currently, [clinicians should continue](#)  
15 [to use their clinical skills to diagnose causes of nipple and breast pain in lactating](#)  
16 [women](#)~~this is not currently useful for clinicians.~~  
17  
18  
19  
20  
21  
22  
23  
24  
25  
26  
27  
28  
29  
30  
31  
32  
33  
34  
35  
36  
37  
38  
39  
40  
41  
42  
43  
44  
45  
46  
47  
48  
49  
50  
51  
52  
53  
54  
55  
56  
57  
58  
59  
60

**Table 1 Characteristics of nulliparous women recruited in late pregnancy**

| <b>Maternal characteristics (n = 346)</b>               | <b>n (%)</b>        |
|---------------------------------------------------------|---------------------|
| Hospital                                                |                     |
| Royal Women's Hospital (public)                         | 154 (44.5)          |
| Frances Perry House (private)                           | 192 (55.5)          |
| Age (years - mean, SD, range)                           | 32.7 (4.1, 19 - 44) |
| Marital status                                          |                     |
| Married                                                 | 229 (66)            |
| Unmarried , living with partner                         | 103 (30)            |
| Not living with partner                                 | 2 (1)               |
| Separated / divorced                                    | 1 (0)               |
| Single                                                  | 11 (3)              |
| Education level                                         |                     |
| Tertiary degree or higher                               | 267 (77)            |
| Other                                                   | 79 (23)             |
| Gestation at recruitment (weeks - mean, SD, range)      | 37 (1.3,34 - 42)    |
| Gestation at birth (weeks - mean, SD, range)            | 39 (1.2, 36 - 42)   |
| Breastfeeding intention (months - mean, range)          | 9.7 (1 - 24)        |
| Caesarean birth                                         | 156 (45)            |
| Baby sex – male                                         | 168 (49)            |
| Any breast milk feeding at 8 weeks postpartum (n = 340) | 320 (94)            |

**Table 2 Results from microbiological analysis of specimens collected from 346 women and their infants (at any time point)**

|                                                                 | Culture positive          | PCR positive | Either culture/PCR positive |
|-----------------------------------------------------------------|---------------------------|--------------|-----------------------------|
| Nipple*                                                         |                           |              |                             |
| <i>C. albicans</i>                                              | 13                        | 15           | 19                          |
| <i>C. glabrata</i>                                              | 1                         | 3            | 4                           |
| <i>Candida</i> spp.                                             | 9                         | 115          | 120                         |
| Any <i>Candida</i> spp.                                         | 21                        | 116          | 125                         |
| <i>S. aureus</i>                                                | 206 (60%)                 | N/A          | N/A                         |
| Breast milk**                                                   |                           |              |                             |
| <i>C. albicans</i>                                              | 9                         | N/A          | N/A                         |
| <i>C. glabrata</i>                                              | 1                         | N/A          | N/A                         |
| <i>Candida</i> spp.                                             | 10                        | N/A          | N/A                         |
| Any <i>Candida</i> spp.                                         | 18                        | N/A          | N/A                         |
| <i>S. aureus</i>                                                | 186 (54%)                 | N/A          | N/A                         |
| Infant nose/mouth**                                             |                           |              |                             |
| <i>C. albicans</i>                                              | 15                        | N/A          | N/A                         |
| <i>C. glabrata</i>                                              | 0                         | N/A          | N/A                         |
| <i>Candida</i> spp.                                             | 5                         | N/A          | N/A                         |
| Any <i>Candida</i> spp.                                         | 18                        | N/A          | N/A                         |
| <i>S. aureus</i>                                                | 253 (73%)                 | N/A          | N/A                         |
| <a href="#">Any <i>Candida</i> spp. in nipple/breast milk</a>   | <a href="#">131 (38%)</a> |              |                             |
| Any <i>Candida</i> spp. in nipple/breast milk/baby              | 133 (38%)                 |              |                             |
| Any <i>S. aureus</i> in nipple/breast milk                      | 231 (67%)                 |              |                             |
| <a href="#">Any <i>S. aureus</i> in nipple/breast milk/baby</a> | <a href="#">277 (80%)</a> |              |                             |

\* Nipple swabs collected at late pregnancy, hospital, weeks 1, 2, 3 and 4.

\*\* Breast milk, and infant nasal and oral swabs, collected at hospital, weeks 1, 2, 3 and 4.

N/A = not applicable.

**~~T~~New table 3– Candida positive on PCR or culture at each visit:**

|                          | Candida PCR positive | Candida PCR negative | Total |
|--------------------------|----------------------|----------------------|-------|
| Candida culture positive | 88                   | 41                   | 129   |
| Candida culture negative | 169                  | 1,817                | 1,986 |
| <b>Total</b>             | 257                  | 1,858                | 2,115 |

**Table 34 Nipple/breast thrush symptoms Case definition and *Candida* spp. (culture or PCR) and *S. aureus* separately (n = 346)**

| Nipple/breast thrush case definition:<br>Burning nipple pain weeks plus breast pain (non-mastitis)<br>Weeks 1- 8                                       |                       |           |
|--------------------------------------------------------------------------------------------------------------------------------------------------------|-----------------------|-----------|
| <b><i>Candida</i> spp. in culture/PCR<br/>(nipple/breast milk/baby)<sup>a</sup></b>                                                                    |                       |           |
| Nipple/breast thrush case<br>definition                                                                                                                | Yes                   | No        |
|                                                                                                                                                        | (n = 127)             | (n = 219) |
|                                                                                                                                                        | Yes (n = 65) 31 (48%) | 34 (21%)  |
| No (n = 281)                                                                                                                                           | 96 (34%)              | 185 (66%) |
| <b><i>S. aureus</i> (nipple/breast milk/baby)<sup>b</sup></b>                                                                                          |                       |           |
| Nipple/breast thrush case<br>definition                                                                                                                | Yes                   | No        |
|                                                                                                                                                        | (n = 274)             | (n = 72)  |
|                                                                                                                                                        | Yes (n = 65) 52 (80%) | 13 (20%)  |
| No (n = 281)                                                                                                                                           | 222 (79%)             | 59 (21%)  |
| Nipple/breast thrush case definition:<br>Burning nipple pain weeks plus breast pain (non-mastitis)<br>Weeks 2- 8                                       |                       |           |
| <b><i>Candida</i> spp. in culture/PCR<br/>(nipple/breast milk/baby)<sup>c</sup></b>                                                                    |                       |           |
| Nipple/breast thrush case<br>definition                                                                                                                | Yes                   | No        |
|                                                                                                                                                        | (n = 127)             | (n = 219) |
|                                                                                                                                                        | Yes (n = 50) 26 (52%) | 24 (48%)  |
| No (n = 296)                                                                                                                                           | 101 (34%)             | 195 (66%) |
| <b><i>S. aureus</i> (nipple/breast milk/baby)<sup>d</sup></b>                                                                                          |                       |           |
| Nipple/breast thrush case<br>definition                                                                                                                | Yes                   | No        |
|                                                                                                                                                        | (n = 274)             | (n = 72)  |
|                                                                                                                                                        | Yes (n = 50) 41 (82%) | 9 (18%)   |
| No (n = 296)                                                                                                                                           | 233 (79%)             | 63 (21%)  |
| Nipple/breast thrush case definition:<br>Burning nipple pain weeks plus breast pain (non-mastitis), <i>excluding</i><br><i>vasospasm</i><br>Weeks 2- 8 |                       |           |
| <b><i>Candida</i> spp. in culture/PCR<br/>(nipple/breast milk/baby)<sup>e</sup></b>                                                                    |                       |           |
| Nipple/breast thrush case<br>definition, excluding vasospasm                                                                                           | Yes                   | No        |
|                                                                                                                                                        | (n = 127)             | (n = 219) |
|                                                                                                                                                        | Yes (n = 48) 26 (54%) | 22 (46%)  |
| No (n = 298)                                                                                                                                           | 101 (34%)             | 197 (66%) |
| <b><i>S. aureus</i> (nipple/breast milk/baby)<sup>f</sup></b>                                                                                          |                       |           |
| Nipple/breast thrush case<br>definition, excluding vasospasm                                                                                           | Yes                   | No        |
|                                                                                                                                                        | (n = 274)             | (n = 72)  |
|                                                                                                                                                        | Yes (n = 48) 40 (83%) | 8 (17%)   |
| No (n = 298)                                                                                                                                           | 234 (79%)             | 64 (21%)  |
| Nipple/breast thrush case definition:<br>Burning nipple pain weeks plus breast pain (non-mastitis)<br>Weeks 1- 8                                       |                       |           |
| <b><i>Candida</i> spp. in culture only<br/>(nipple)<sup>g</sup></b>                                                                                    |                       |           |
| Nipple/breast thrush case                                                                                                                              | Yes                   | No        |

31 [January 2013](#)–[November 2012](#)

| definition |              | (n = 21) | (n = 325) |
|------------|--------------|----------|-----------|
|            | Yes (n = 65) | 9 (14%)  | 56 (86%)  |
|            | No (n = 281) | 12 (4%)  | 269 (96%) |

<sup>a</sup>Chi<sup>2</sup>(1) = 4.1587, p = 0.041

<sup>b</sup>Chi<sup>2</sup>(1) = 0.0318, p = 0.858

<sup>c</sup>Chi<sup>2</sup>(1) = 5.8850, p = 0.015

<sup>d</sup>Chi<sup>2</sup>(1) = 0.2799, p = 0.597

<sup>e</sup>Chi<sup>2</sup>(1) = 7.3142, p = 0.007

<sup>f</sup>Chi<sup>2</sup>(1) = 0.5804, p = 0.446

<sup>g</sup>Chi<sup>2</sup>(1) = 8.4905, p = 0.004

**Table 5 Time-to-event analysis of predictors of first symptoms of case definition**

|                                   |     | Events <sup>1</sup> | Years at risk <sup>2</sup> | Rate Ratio (95%CI) | p-value | Multivariate Rate Ratio (95%CI) | p-value |
|-----------------------------------|-----|---------------------|----------------------------|--------------------|---------|---------------------------------|---------|
| <b>Candida (nipple/milk/baby)</b> | No  | 35                  | 18.3                       |                    |         |                                 |         |
|                                   | Yes | 23                  | 6.4                        | 1.87 (1.10, 3.16)  | 0.018   | 2.03 (1.19, 3.45)               | 0.009   |
| <b>S. aureus (nipple/milk)</b>    | No  | 19                  | 10.5                       |                    |         |                                 |         |
|                                   | Yes | 39                  | 14.2                       | 1.53 (0.88, 2.64)  | 0.128   | 1.415 (0.80, 2.46)              | 0.234   |
| <b>Nipple damage</b>              | No  | 11                  | 8.7                        |                    |         |                                 |         |
|                                   | Yes | 47                  | 16.1                       | 2.3 (1.19, 4.43)   | 0.012   | 2.39 (1.21, 4.70)               | 0.012   |

<sup>1</sup>Women with case definition in the first 4 weeks postpartum

<sup>2</sup>Total observed time between birth and first symptoms of case definition or 4 weeks postpartum (whichever occurred first)

1  
2  
3  
4  
5  
6  
7  
8  
9  
10  
11  
12  
13  
14  
15  
16  
17  
18  
19  
20  
21  
22  
23  
24  
25  
26  
27  
28  
29  
30  
31  
32  
33  
34  
35  
36  
37  
38  
39  
40  
41  
42  
43  
44  
45  
46  
47  
48  
49  
50  
51  
52  
53  
54  
55  
56  
57  
58  
59  
60

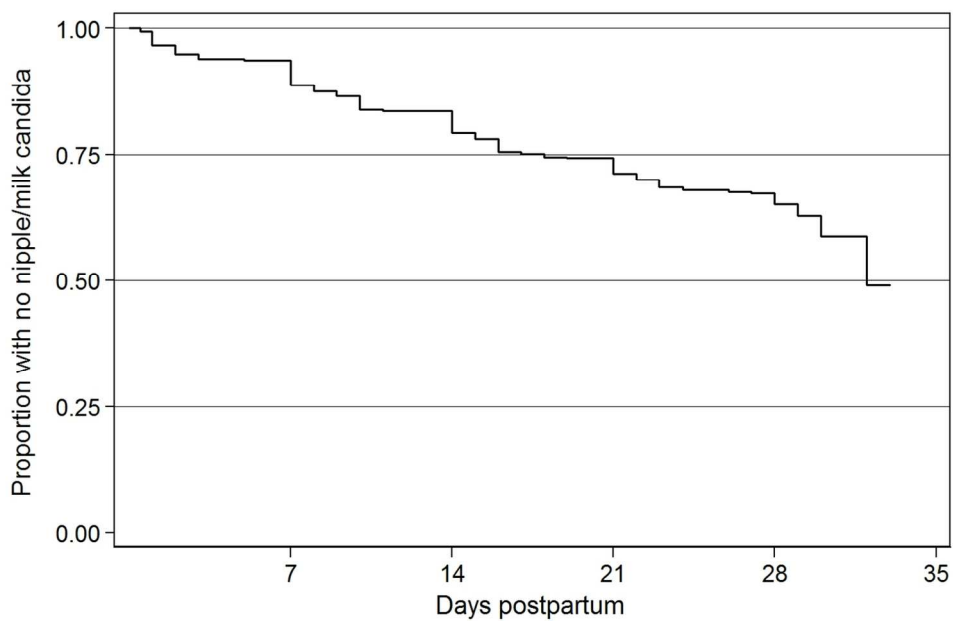

Survival curve for first time to nipple/milk Candida  
134x90mm (300 x 300 DPI)

Review only



1  
2  
3  
4  
5  
6  
7  
8  
9  
10  
11  
12  
13  
14  
15  
16  
17  
18  
19  
20  
21  
22  
23  
24  
25  
26  
27  
28  
29  
30  
31  
32  
33  
34  
35  
36  
37  
38  
39  
40  
41  
42  
43  
44  
45  
46  
47  
48  
49  
50  
51  
52  
53  
54  
55  
56  
57  
58  
59  
60

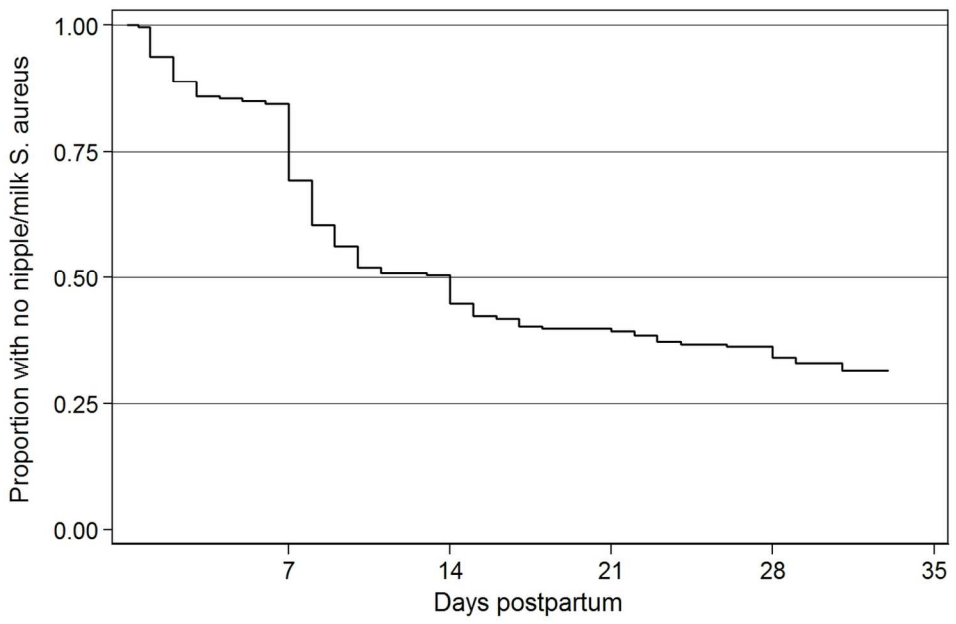

Survival curve for time to first nipple/milk S. aureus  
134x90mm (300 x 300 DPI)

Review only

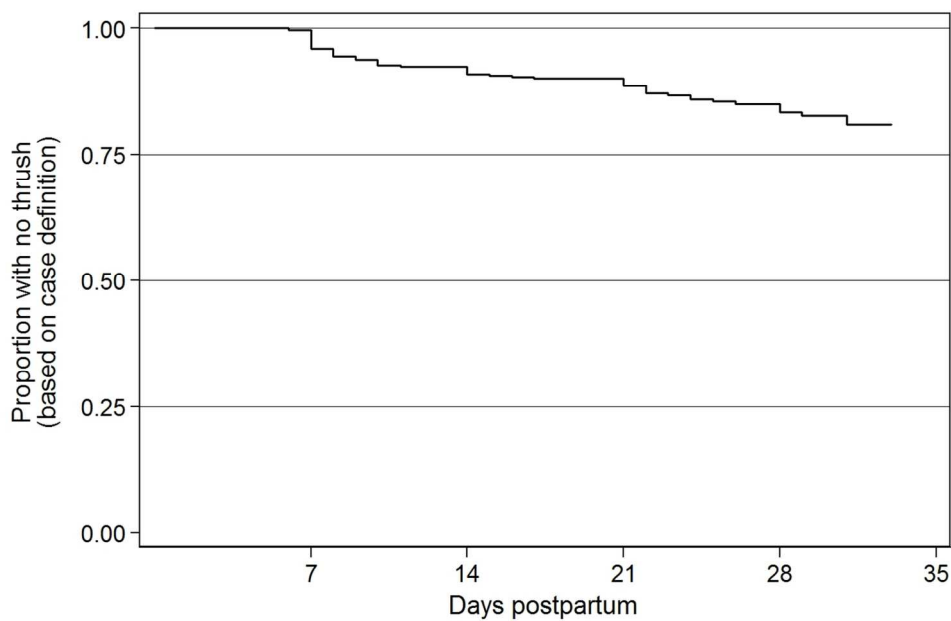

Survival curve for time to first symptoms of case definition of "breast thrush"  
134x90mm (300 x 300 DPI)

Review only

1  
2  
3  
4  
5  
6  
7  
8  
9  
10  
11  
12  
13  
14  
15  
16  
17  
18  
19  
20  
21  
22  
23  
24  
25  
26  
27  
28  
29  
30  
31  
32  
33  
34  
35  
36  
37  
38  
39  
40  
41  
42  
43  
44  
45  
46  
47  
48  
49  
50  
51  
52  
53  
54  
55  
56  
57  
58  
59  
60

STROBE Statement—Checklist of items that should be included in reports of *cohort studies*

|                              | Item No | Recommendation                                                                                                                                                                                                                                                                                                         |
|------------------------------|---------|------------------------------------------------------------------------------------------------------------------------------------------------------------------------------------------------------------------------------------------------------------------------------------------------------------------------|
| <b>Title and abstract</b>    | 1       | (a) Indicate the study's design with a commonly used term in the title or the abstract                                                                                                                                                                                                                                 |
| <b>Yes</b>                   |         | (b) Provide in the abstract an informative and balanced summary of what was done and what was found                                                                                                                                                                                                                    |
| <b>Introduction</b>          |         |                                                                                                                                                                                                                                                                                                                        |
| <b>Yes</b>                   |         |                                                                                                                                                                                                                                                                                                                        |
| Background/rationale         | 2       | Explain the scientific background and rationale for the investigation being reported                                                                                                                                                                                                                                   |
| Objectives                   | 3       | State specific objectives, including any prespecified hypotheses                                                                                                                                                                                                                                                       |
| <b>Methods</b>               |         |                                                                                                                                                                                                                                                                                                                        |
| <b>Yes</b>                   |         |                                                                                                                                                                                                                                                                                                                        |
| Study design                 | 4       | Present key elements of study design early in the paper                                                                                                                                                                                                                                                                |
| Setting                      | 5       | Describe the setting, locations, and relevant dates, including periods of recruitment, exposure, follow-up, and data collection                                                                                                                                                                                        |
| Participants                 | 6       | (a) Give the eligibility criteria, and the sources and methods of selection of participants. Describe methods of follow-up<br>(b) For matched studies, give matching criteria and number of exposed and unexposed N/A                                                                                                  |
| Variables                    | 7       | Clearly define all outcomes, exposures, predictors, potential confounders, and effect modifiers. Give diagnostic criteria, if applicable                                                                                                                                                                               |
| Data sources/<br>measurement | 8*      | For each variable of interest, give sources of data and details of methods of assessment (measurement). Describe comparability of assessment methods if there is more than one group                                                                                                                                   |
| Bias                         | 9       | Describe any efforts to address potential sources of bias                                                                                                                                                                                                                                                              |
| Study size                   | 10      | Explain how the study size was arrived at                                                                                                                                                                                                                                                                              |
| Quantitative variables       | 11      | Explain how quantitative variables were handled in the analyses. If applicable, describe which groupings were chosen and why                                                                                                                                                                                           |
| Statistical methods          | 12      | (a) Describe all statistical methods, including those used to control for confounding<br>(b) Describe any methods used to examine subgroups and interactions<br>(c) Explain how missing data were addressed<br>(d) If applicable, explain how loss to follow-up was addressed<br>(e) Describe any sensitivity analyses |
| <b>Results</b>               |         |                                                                                                                                                                                                                                                                                                                        |
| <b>YES</b>                   |         |                                                                                                                                                                                                                                                                                                                        |
| Participants                 | 13*     | (a) Report numbers of individuals at each stage of study—eg numbers potentially eligible, examined for eligibility, confirmed eligible, included in the study, completing follow-up, and analysed<br>(b) Give reasons for non-participation at each stage<br>(c) Consider use of a flow diagram                        |
| Descriptive data             | 14*     | (a) Give characteristics of study participants (eg demographic, clinical, social) and information on exposures and potential confounders<br>(b) Indicate number of participants with missing data for each variable of interest<br>(c) Summarise follow-up time (eg, average and total amount)                         |
| Outcome data                 | 15*     | Report numbers of outcome events or summary measures over time                                                                                                                                                                                                                                                         |
| Main results                 | 16      | (a) Give unadjusted estimates and, if applicable, confounder-adjusted estimates and their precision (eg, 95% confidence interval). Make clear which confounders were adjusted for and why they were included                                                                                                           |

|                          |    |                                                                                                                                                                            |
|--------------------------|----|----------------------------------------------------------------------------------------------------------------------------------------------------------------------------|
|                          |    | (b) Report category boundaries when continuous variables were categorized                                                                                                  |
|                          |    | (c) If relevant, consider translating estimates of relative risk into absolute risk for a meaningful time period                                                           |
| Other analyses           | 17 | Report other analyses done—eg analyses of subgroups and interactions, and sensitivity analyses                                                                             |
| <b>Discussion</b>        |    |                                                                                                                                                                            |
| <b>YES</b>               |    |                                                                                                                                                                            |
| Key results              | 18 | Summarise key results with reference to study objectives                                                                                                                   |
| Limitations              | 19 | Discuss limitations of the study, taking into account sources of potential bias or imprecision. Discuss both direction and magnitude of any potential bias                 |
| Interpretation           | 20 | Give a cautious overall interpretation of results considering objectives, limitations, multiplicity of analyses, results from similar studies, and other relevant evidence |
| Generalisability         | 21 | Discuss the generalisability (external validity) of the study results                                                                                                      |
| <b>Other information</b> |    |                                                                                                                                                                            |
| <b>YES</b>               |    |                                                                                                                                                                            |
| Funding                  | 22 | Give the source of funding and the role of the funders for the present study and, if applicable, for the original study on which the present article is based              |

\*Give information separately for exposed and unexposed groups.

**Note:** An Explanation and Elaboration article discusses each checklist item and gives methodological background and published examples of transparent reporting. The STROBE checklist is best used in conjunction with this article (freely available on the Web sites of PLoS Medicine at <http://www.plosmedicine.org/>, Annals of Internal Medicine at <http://www.annals.org/>, and Epidemiology at <http://www.epidem.com/>). Information on the STROBE Initiative is available at <http://www.strobe-statement.org>.
